# Supplementary material for: Radiologically isolated syndrome: an uncommon finding at a university clinic in a high-prevalence region for multiple sclerosis
Source: PubMed Central journal article supplement — BMJ Open. 2013 Nov 4;3(11):e003531. doi: 10.1136/bmjopen-2013-003531 (PMC3822304; doi:10.1136/bmjopen-2013-003531), 2013-11-04
Supplement: bmjopen-2013-003531.draft_revisions.pdf [file bmjopen-2013-003531.draft_revisions.pdf]

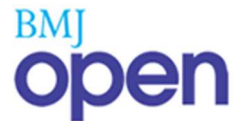

**Radiologically isolated syndrome - an uncommon finding at a university clinic in a high-prevalence region for multiple sclerosis**

|                                 |                                                                                                                                                                                                                                                                                                                                                                                                                                                                                                                    |
|---------------------------------|--------------------------------------------------------------------------------------------------------------------------------------------------------------------------------------------------------------------------------------------------------------------------------------------------------------------------------------------------------------------------------------------------------------------------------------------------------------------------------------------------------------------|
| Journal:                        | <i>BMJ Open</i>                                                                                                                                                                                                                                                                                                                                                                                                                                                                                                    |
| Manuscript ID:                  | bmjopen-2013-003531                                                                                                                                                                                                                                                                                                                                                                                                                                                                                                |
| Article Type:                   | Research                                                                                                                                                                                                                                                                                                                                                                                                                                                                                                           |
| Date Submitted by the Author:   | 03-Jul-2013                                                                                                                                                                                                                                                                                                                                                                                                                                                                                                        |
| Complete List of Authors:       | Granberg, Tobias; Karolinska Institutet, Department of Clinical Science, Intervention and Technology<br>Martola, Juha; Karolinska Institutet, Department of Clinical Science, Intervention and Technology<br>Kristoffersen Wiberg, Maria; Karolinska Institutet, Department of Clinical Science, Intervention and Technology<br>Aspelin, Peter; Karolinska Institutet, Department of Clinical Science, Intervention and Technology<br>Fredrikson, Sten; Karolinska Institutet, Department of Clinical Neuroscience |
| <b>Primary Subject Heading</b>: | Neurology                                                                                                                                                                                                                                                                                                                                                                                                                                                                                                          |
| Secondary Subject Heading:      | Radiology and imaging                                                                                                                                                                                                                                                                                                                                                                                                                                                                                              |
| Keywords:                       | Multiple sclerosis < NEUROLOGY, Neuroradiology < RADIOLOGY & IMAGING, Magnetic resonance imaging < RADIOLOGY & IMAGING                                                                                                                                                                                                                                                                                                                                                                                             |
|                                 |                                                                                                                                                                                                                                                                                                                                                                                                                                                                                                                    |

SCHOLARONE™  
Manuscripts

1  
2  
3  
4  
5  
6  
7  
8  
9 **Radiologically isolated syndrome - an uncommon finding at a university clinic in a**  
10 **high-prevalence region for multiple sclerosis**  
11

12  
13  
14 Dr Tobias Granberg<sup>a</sup>, MD; Dr Juha Martola<sup>a</sup>, MD, PhD; Assoc prof Maria Kristoffersen-  
15 Wiberg<sup>a</sup>, MD, PhD; Prof Peter Aspelin<sup>a</sup>, MD, PhD; Prof Sten Fredrikson<sup>b</sup>, MD, PhD.

16  
17  
18 <sup>a</sup>Department of Clinical Science, Intervention and Technology, Karolinska Institutet,  
19 Stockholm, Sweden.

20  
21  
22 <sup>b</sup>Department of Clinical Neuroscience, Karolinska Institutet, Stockholm, Sweden.  
23

24  
25  
26 Corresponding author:

27 Tobias Granberg

28  
29 Department of Clinical Science, Intervention and Technology, C1-46

30  
31 Karolinska University Hospital

32  
33 141 86 STOCKHOLM, SWEDEN

34  
35 Email: [tobias.granberg@ki.se](mailto:tobias.granberg@ki.se)

36  
37 Telephone (mobile): +46 700 60 60 87

38  
39 Fax: +46 87 11 48 40  
40

41  
42  
43 Word count: 2725

44  
45 Number of tables: 3

46  
47 Number of figures: 2 (2 black-and-white, 0 in colour)

48  
49 Supplementary files: None

50  
51 Keywords: Radiologically Isolated Syndrome, Multiple Sclerosis, Magnetic Resonance

52  
53 Imaging, Incidental findings, Asymptomatic diseases  
54  
55  
56  
57  
58  
59  
60

## ABSTRACT

**Objective:** The improved availability of magnetic resonance imaging (MRI) in medicine has led to an increase in incidental findings. Unexpected brain MRI findings suggestive of multiple sclerosis (MS) without typical symptoms of MS were recently defined as radiologically isolated syndrome (RIS). The prevalence of RIS is uncertain. The aim of this study was to determine the prevalence of RIS [at a university hospital](#) in a [country-region](#) with a high prevalence for MS and describe the long-term prognosis of the identified patients.

**Comment [TG1]:** The abstract has been restructured according to BMJ Open standards

**Design:** Retrospective cohort study conducted in 2012.

**Setting:** All brain MRI examinations performed at Karolinska University Hospital in Huddinge, Stockholm, Sweden during 2001 were retrospectively screened by a single rater for findings fulfilling the Okuda criteria. The sample year was chosen in order to establish the long-term prognosis of the patients identified. The examinations of interest were re-evaluated according to the Barkhof criteria by a neuroradiologist with long experience in MS.

**Participants:** In total 2105 individuals were included in the study. Ages ranged from 0 to 90 years with a median age of 48 years. Only one patient with RIS was identified, equivalent to a prevalence of 0.05% in the studied population, or 0.15% among patients aged 15 to 40 years. The patient with RIS developed symptoms consistent with MS within three months accompanied with radiological progression and was diagnosed with MS.

**Conclusions:** RIS, according to present criteria, is an uncommon finding in a tertiary setting in a high-prevalence [country-region](#) for MS where awareness and clinical suspicion of MS is common. In order to study the prognosis of RIS, multi-center studies, or case-control studies are recommended.

## ARTICLE SUMMARY

### Article focus

- Incidental magnetic resonance imaging findings suggestive of multiple sclerosis in patients without typical symptoms of demyelinating disease is called Radiologically Isolated Syndrome and poses a clinical dilemma for physicians.
- The aim of this study was to investigate the prevalence of the newly defined Radiologically Isolated Syndrome at a university clinic in Stockholm, Sweden.

### Key messages

- Radiologically Isolated Syndrome was an uncommon finding, and was identified only in 1 out of 2105 examined individuals (0.05 %).
- The patient rapidly progressed radiologically and clinically to multiple sclerosis.

### Strengths and limitations of this study

- This is the first study reporting on the frequency of Radiologically Isolated Syndrome in a high-prevalence region for multiple sclerosis.
- The study was a systematic re-evaluation of a yearly sample at a large university clinic.
- The retrospective nature of the study gives the possibility to report on the long-term prognosis for the patients, but also gives rise to losses to follow-up.
- The generalizability of the results to non-tertiary settings and to regions with a lower

1  
2  
3  
4  
5  
6  
7 prevalence of multiple sclerosis is limited.  
8  
9  
10  
11  
12  
13  
14  
15  
16  
17  
18  
19  
20  
21  
22  
23  
24  
25  
26  
27  
28  
29  
30  
31  
32  
33  
34  
35  
36  
37  
38  
39  
40  
41  
42  
43  
44  
45  
46  
47  
48  
49  
50  
51  
52  
53  
54  
55  
56  
57  
58  
59  
60

For peer review only

## INTRODUCTION

Magnetic resonance imaging (MRI) has revolutionised our ability to image the central nervous system and it has become readily accessible in clinical practice. With the improved availability and sensitivity of MRI there is an increase in incidental findings.<sup>1</sup> In 2009, Okuda and colleagues defined incidental MRI findings suggestive of multiple sclerosis (MS) without typical MS symptoms as Radiologically Isolated Syndrome (RIS).<sup>2</sup> This has led to an increased awareness of this condition and a convergence in terminology.<sup>3</sup>

Since the definition of RIS, studies by Lebrun, Okuda, de Stefano, Amato, Siva, Giorgio, and their colleagues have been especially important in showing that there is a close association between RIS and MS. Patients with RIS often have a subclinical cognitive impairment with a similar test profile of deficits compared to patients with MS.<sup>4-6</sup> The association of RIS and MS is also strengthened in that both patient groups show similarities in both qualitative and quantitative MRI measurements.<sup>6-8</sup> There are case reports with follow-ups of up to 10 years,<sup>4,9,10</sup> and the range of mean follow-up times in the published cohorts are 2-4 to 7 years.<sup>2,11-17</sup> These studies show that roughly two-thirds progress radiologically and one-third develop clinical symptoms, and thereby convert to clinically isolated syndrome or MS, during their follow-up times.<sup>3</sup> This suggests that RIS in some cases may be considered to be preclinical MS. The patients with RIS is therefore of particular interest to study in a pathophysiological aspect since it may shed light on early changes that precedes the onset of classical MS symptoms.

Headache is the most common reason for performing the initial MRI unveiling RIS, but it is unclear if there is a causative relationship between the incidental MRI findings and the headaches.<sup>3</sup> Recently a study by Liu and colleagues showed that among patients undergoing a

1  
2  
3  
4  
5  
6  
7 MRI of the brain due to headaches, MRI findings fulfilling the Barkhof criteria are common.  
8  
9 Depending on the definition of juxtacortical and periventricular, 2.4–7.1% of the patients  
10 fulfilled the Barkhof criteria.<sup>18</sup>  
11

12  
13  
14 ~~Although RIS is a newly defined entity, incidental MS findings are previously known from~~  
15 ~~previous anatomopathological autopsy studies from the late 20<sup>th</sup> century~~  
16 ~~indicating performed in the 1960s to the 1990s in Europe and North America.[4–7] As a~~  
17 ~~systematic review of RIS recently concluded, these studies with 2,450 to 15,644 patients~~  
18 ~~indicated a frequency of unexpected post-mortem MS findings in the range of 0.08–0.2%.<sup>19–</sup>~~  
19  
20  
21  
22  
23  
24 <sup>22</sup> ~~It is, however, hard to interpret what relevance these results have today with the reported~~  
25 ~~increase of MS incidence and prevalence in many regions.[3]~~  
26

27  
28 The incidence and prevalence of the newly defined RIS is, however, currently unknown.<sup>3</sup>

29  
30 In 2009 Morris and colleagues published a meta-analysis of 16 studies including 15,559  
31 healthy control subjects that reported nine cases of “definite demyelination” and four cases of  
32 “possible demyelination” corresponding to a frequency of 0.06% and 0.03% respectively.<sup>1</sup>  
33  
34 There is unfortunately no report on the clinical history or neurological examination of these  
35 cases why the results cannot be assumed to reflect RIS. Instead the results of five original  
36 articles, identified as the most relevant, are described below.  
37  
38  
39  
40  
41

42  
43 An American study published in 1996, described 23 patients with MRI findings highly  
44 suggestive of MS (according to Paty’s classification) in a population of 2,783 psychiatric  
45 patients. However, 13 patients had neurological symptoms that were not further specified,  
46 which gives a possible asymptomatic frequency of roughly 0.4%. It is unknown if these  
47 patients had any neurological findings that would exclude them from a RIS diagnosis.<sup>23</sup> The  
48 results are nonetheless interesting since psychiatric symptoms have frequently been reported  
49  
50  
51  
52  
53  
54  
55  
56  
57  
58  
59  
60

1  
2  
3  
4  
5  
6  
7 as the original indication for performing the MRI examination that unveiled the RIS.<sup>3</sup> A  
8 second American study published in 1999 showed that among 1,000 asymptomatic subjects,  
9 there were three persons (0.3%) with findings classified as possible demyelinating disease.<sup>24</sup>  
10 A German study published in 2006 described a cohort of 2,536 young male military recruits  
11 in which one person (0.04%) had findings suggestive of demyelinating disease, but it is not  
12 specified if this person had any neurological symptoms or findings.<sup>25</sup> A second German study  
13 was published in 2010, which showed that of 206 healthy young volunteers two (1.0%) had  
14 multiple white matter lesions, but it is unclear whether the findings fulfilled the Barkhof  
15 criteria.<sup>26</sup>  
16  
17  
18  
19  
20  
21  
22  
23  
24  
25

26 [The only study reporting on the frequency of RIS since its definition comes from a](#)  
27 [hospital based study. The latest MRI study, performed in Pakistan published in 2011. It](#)  
28 revealed that out of 864 persons in the ages 15 to 40 years there were six cases (0.7%) of  
29 incidental MRI findings suggestive of MS in patients without relapsing neurological  
30 symptoms or pathological neurological findings.<sup>27</sup> This last study reports a surprisingly high  
31 frequency of such findings in a region reported to have a low prevalence of MS (<5 per  
32 100,000 population).<sup>28</sup> In comparison the estimated prevalence of MS in Sweden, where the  
33 present study was conducted, is 189 per 100,000 population.<sup>29</sup> [In conclusion there has not](#)  
34 [been any study reporting on the prevalence of RIS in a high-prevalence region for MS](#)  
35 [since the definition of RIS.](#)  
36  
37  
38  
39  
40  
41  
42  
43  
44  
45

46  
47 This study aims to clarify in what frequency RIS findings can be expected in a tertiary  
48 hospital setting in a high-prevalence ~~country~~-region for MS and depict the long-term  
49 prognosis of RIS in the patients identified.  
50  
51  
52  
53  
54

## 55 METHODS

56  
57  
58  
59  
60



### Study population and ethical approval

The study sample in this retrospective study conducted in 2012 is based on the digital radiological information system and digital patient charts at Karolinska University Hospital, Huddinge (formerly Huddinge University Hospital), Stockholm, Sweden. The hospital is a tertiary referral hospital for the greater southern Stockholm area with a population of 800,000 inhabitants. In order to establish the long-term prognosis of the patients identified the sample year was chosen to 2001, when both the patient charts and the radiological data were fully digitalised. [All persons undergoing a brain MRI at the hospital during the sample year were included in the study.](#) The study was approved by the regional ethical review board in Stockholm at Karolinska Institutet, which allowed a general screening of the examinations described above, and written informed consent was obtained according to the approval in those cases where more information was necessary through access of the clinical patient charts.

### Screening method

The screening of the study population was made systematically by one physician at the radiology department with previous experience of radiological research (TG). All documentation from the MRI examinations from 2001 was available to the screener and read to full extent. The material included both the query, the clinical information in the referral (clinical history, symptoms, and findings) as well as the radiological findings according to the regular clinical radiological assessment.

### MRI examinations

All MRI examinations were performed in the regular clinical setting in one of two 1.5 T MRI machines, Siemens Magnetom Vision and Symphony (Siemens Medical Systems GmbH, Erlangen, Germany). The MRI examinations were performed according to standard clinical

protocols depending on the original clinical query and white matter anomalies were in most cases further characterised with the standardised MS MRI protocol used at the clinic described in Table 1.

**Table 1**

MRI parameters of the standardised MS protocol

| Sequence  | Plane    | SLT<br>(mm) | TR<br>(ms) | TE<br>(ms) | TI<br>(ms) | FA<br>(°) |
|-----------|----------|-------------|------------|------------|------------|-----------|
| T1 MPRAGE | Axial    | 1.5         | 13.5       | 7          | 300        | 15        |
| PD TSE    | Axial    | 3.0         | 4761       | 22         | -          | 180       |
| T2 TSE    | Axial    | 3.0         | 4761       | 90         | -          | 180       |
| T2 TSE*   | Sagittal | 4.0         | 3500       | 96         | -          | 180       |
| FLAIR*    | Axial    | 5.0         | 9000       | 110        | 2500       | 180       |
| T1 SE*    | Axial    | 5.0         | 570        | 14         | -          | 90        |

\*Acquired post-gadolinium-DTPA contrast media.

FA, flip angle; FLAIR, fluid attenuated inversion recovery; MPRAGE, three-dimensional magnetization prepared rapid acquisition gradient echo; PD, proton density; SE, spin echo; SLT, slice thickness; TE, echo time; TI, inversion time; TR, repetition time; TSE, turbo spin echo.

### Radiological assessment

All examinations had been reviewed, signed, and contra-signed as part of the regular clinical radiological routine. At least one of the clinical reviewers was a specialist in neuroradiology. The examinations identified with possible RIS findings in the screening process were re-evaluated according to the Barkhof criteria by another neuroradiologist (JM) with long experience of classifying MS-like findings.

### Clinical assessment

The referring doctor conducted the initial clinical assessments. All patients that were identified as possible RIS cases in the screening had been examined by a neurologists as part of the following clinical investigation. All patients diagnosed with MS received their diagnosis according to contemporaneous diagnostic criteria after careful investigation lead by a neurologist with experience of MS.

## RESULTS

### Prevalence of RIS

During the year of 2001 a total of 2105 individuals had at least one MRI examination of the brain at Karolinska University Hospital in Huddinge, Stockholm, Sweden. Among the patients there were 903 men (43%) and 1202 women (57%) with an age span of 0 to 90 years with 669 persons being between 15 and 40 years of age. Mean age was 46.2 years and median age was 48 years. The following results are also schematically described in Figure 1. Out of all patients 542 had normal findings. The spectrum of findings is presented in Table 2. Common findings besides white matter changes were tumours, atrophy, infarctions, and sinusitis.

**Table 2**

Overview of MRI findings (n)

|                                                     |             |
|-----------------------------------------------------|-------------|
| <b>Within normal limits</b>                         | <b>542</b>  |
| <b>Cerebrovascular disorders</b>                    | <b>326</b>  |
| - Aneurysm                                          | 8           |
| - Carotid dissection or occlusion                   | 12          |
| - Cavernous malformation                            | 19          |
| - Cerebral contusions                               | 4           |
| - Cortical infarction                               | 89          |
| - Developmental venous anomaly                      | 29          |
| - Lacunar infarction                                | 133         |
| - Intracerebral haemorrhage                         | 15          |
| - Cerebral venous sinus thrombosis                  | 5           |
| - Subarachnoid haemorrhage                          | 3           |
| - Subdural hematoma or hygroma                      | 6           |
| - Other                                             | 3           |
| <b>White matter and neurodegenerative disorders</b> | <b>1143</b> |
| - Atrophy                                           | 285         |
| - Basal ganglia disorders                           | 12          |
| - Hydrocephalus                                     | 20          |
| - Marked perivascular spaces                        | 37          |

1  
2  
3  
4  
5  
6  
7  
8  
9  
10  
11  
12  
13  
14  
15  
16  
17  
18  
19  
20  
21  
22  
23  
24  
25  
26  
27  
28  
29  
30  
31  
32  
33  
34  
35  
36  
37  
38  
39  
40  
41  
42  
43  
44  
45  
46  
47  
48  
49  
50  
51  
52  
53  
54  
55  
56  
57  
58  
59  
60

|                                                         |            |
|---------------------------------------------------------|------------|
| - Possibly inflammatory white matter changes            | 356        |
| - Unspecific or degenerative white matter changes       | 433        |
| <b>Infectious, inflammatory and metabolic disorders</b> | <b>88</b>  |
| - Cerebral abscess                                      | 7          |
| - Congenital metabolic disorders                        | 4          |
| - Encephalitis                                          | 10         |
| - Meningitis                                            | 15         |
| - Optical neuritis                                      | 37         |
| - Vasculitis                                            | 4          |
| - Other                                                 | 11         |
| <b>Neoplasms</b>                                        | <b>311</b> |
| - Acoustic neuroma                                      | 19         |
| - Glioma                                                | 21         |
| - Meningioma                                            | 44         |
| - Metastasis                                            | 18         |
| - Pituitary adenoma                                     | 31         |
| - Unspecified or other type of neoplasm                 | 46         |
| <b>Cysts and malformations</b>                          | <b>74</b>  |
| - Arachnoid cyst                                        | 24         |
| - Empty sella                                           | 9          |
| - Malformation or dysplasia                             | 16         |
| - Parenchymal cyst                                      | 5          |
| - Pineal cyst                                           | 13         |
| - Pituitary cyst                                        | 7          |
| <b>Sinonasal and orbital disorders</b>                  | <b>191</b> |
| - Sinusitis                                             | 164        |
| - Mastoiditis                                           | 23         |
| - Other                                                 | 4          |

In total 789 patients had white matter anomalies (not involving those caused by other diseases). Out of these patients, 433 had unspecific white matter changes that did not fulfil the Barkhof criteria (solitary findings) or had a more likely explanation; such as an ischemic-degenerative pattern in elderly and/or patients with known severe cardiovascular disease. Out of the 356 patients with white matter changes possibly reflecting demyelinating disease, 158

1  
2  
3  
4  
5  
6  
7 patients were known to have MS and 6 received their MS diagnosis as part of the  
8 investigation in question. Out of the 192 remaining patients 139 were reported to have  
9 apparent neurological symptoms in the referral that would exclude the findings from being  
10 classified as RIS according to the B criteria in the Okuda classification, but where it was  
11 unclear if they had already gotten a diagnosis of Clinically Isolated Syndrome or MS.  
12  
13 After this screening only 53 patients remained with findings that were plausible RIS but  
14 where more clinical information was needed. In compliance with the ethical approval these  
15 patients were asked for written informed consent in order for us to evaluate their clinical  
16 patient charts.  
17  
18  
19  
20  
21  
22  
23  
24  
25

26 Of these 53 patients where further information was needed, 3 patients were deceased, 7 did  
27 not respond and 4 declined participation. The patient charts of the remaining 39 persons that  
28 gave their informed consent were then examined in order to better understand the patients'  
29 clinical history, symptoms and neurological findings. This additional information revealed  
30 that 21 had been diagnosed with MS. Another 12 had intermittent clinical symptoms  
31 dismissing a RIS classification, presented in Table 3, but where the patients had not yet  
32 received a diagnosis of MS. In 3 cases there was insufficient clinical data to draw a  
33 conclusion. ~~(such as hemidysesthesia, Lhermitte's sign, diplopia, and ataxia) and in 3 cases~~  
34 ~~there was insufficient clinical data to draw a conclusion.~~ In the end, 3 patients with plausible  
35 RIS remained and after neuroradiological assessment 1 patient was classified as having RIS.  
36  
37  
38  
39  
40  
41  
42  
43  
44  
45  
46  
47 This is equivalent to a prevalence of 0.05% in the studied population and 0.15% among the  
48 patients in the ages of 15 to 40 years.  
49  
50

### 51 **Table 3**

52 Presenting symptoms in the 12 patients not classified as RIS  
53  
54  
55  
56  
57  
58  
59  
60

**Comment [TG2]:** Table 3 is a new addition to this manuscript

| Sex | Age (years) | Symptoms                                 |
|-----|-------------|------------------------------------------|
| F   | 25          | Optical neuritis, Lhermitte's sign       |
| F   | 26          | Diplopia, hemiparesis                    |
| F   | 39          | Optical neuritis, facial hemidysesthesia |
| F   | 43          | Optical neuritis                         |
| F   | 47          | Recurrent hemidysesthesia                |
| F   | 58          | Trigeminal neuralgia                     |
| F   | 62          | Hemidysesthesia, facial paralysis        |
| F   | 62          | Hemidysesthesia                          |
| M   | 18          | Severe vertigo, ataxia                   |
| M   | 18          | Lhermitte's sign                         |
| M   | 27          | Diplopia, vertigo, dysesthesia           |
| M   | 44          | Hypesthesia                              |

F, female; M, male.

### Case description

The patient with RIS was a 43 year-old woman without any neurological symptoms or any history of neurological disorders except for migraine since more than 10 years. A neurological examination did not reveal any pathological findings. She had good effect of triptanes. Due to her long history of migraine and still frequent attacks she was referred for a MRI of the brain in February of 2001. The scan showed 15 supratentorial T2 lesions, out of which 12 were periventricular and 2 were juxtacortical. Gadolinium enhanced sequences showed enhancement in one of the lesions. Thus three out of four of the Barkhof criteria were fulfilled.<sup>30</sup> Images obtained from this subject can be seen in Figure 2. Because of the MRI findings, she was referred to a neurologist in March where a second neurological examination was normal. CSF analysis revealed oligoclonal bands and an elevated IgG index. In May she returned to the neurological clinic due to a sudden onset of intermittent bilateral symptoms in arms and hands. A new neurological examination revealed bilateral tremor and dysmetria. A new MRI in June showed three new non-enhancing supratentorial lesions. She was diagnosed with MS and at a follow-up in September the symptoms in the upper extremities had worsened. She received prednisolone treatment and was started on interferon beta therapy. In November she had Lhermitte's sign and a MRI showed a cervical spine lesion. [Except for](#)

1  
2  
3  
4  
5  
6  
7 [one occurrence of lower extremity symptoms in 2005.](#) ~~Since then~~ she has remained  
8 relapse free as of the latest neurological follow-up in [March 2013](#)~~2010~~.  
9  
10

## 11 12 **DISCUSSION**

13  
14 This study shows that RIS, according to present stringent criteria, is an uncommon finding, in  
15 a tertiary radiological clinic in a region with a high prevalence of MS, where awareness and  
16 clinical suspicion of MS is common.<sup>29</sup> The RIS frequency of 0.05% is in alignment with  
17 previous anatomic-pathological studies and earlier MRI studies have shown that “incidental”  
18 or “asymptomatic” MS is relatively uncommon.<sup>19–26</sup> The ~~highest only known~~ reported  
19 frequency of RIS [since its definition](#), 0.7%, comes from a report from the Karachi region of  
20 Pakistan.<sup>27</sup> In contrast, the current study reports a frequency of RIS of 0.15% in the same age  
21 group. Although the studies are not directly comparable due to dissimilarities in methodology,  
22 it is of interest to consider the difference in results further. A possible explanation may be the  
23 high awareness of MS in Sweden and frequent clinical suspicion when referring patients for  
24 MRI. The results could possibly also be affected by the fact that a majority of the referrals to  
25 the radiological clinic participating in this study comes from the in-hospital clinics, whilst  
26 patients initially seeking their family practitioner might have been referred to a non-tertiary  
27 radiological clinic for an MRI. How the fact that the study site is a tertiary setting has affected  
28 the reported prevalence is therefore hard to appreciate. Another explanation for the difference  
29 might be that the study from Pakistan was a semi-retrospective and -prospective study, which  
30 might have been more effective in identifying patients with these findings and suffering from  
31 less losses to follow-up. In the study from Pakistan there were also fewer patients examined in  
32 a more densely populated area, likely mirroring a lower availability of MRI in the Karachi  
33 region than the Stockholm region, perhaps making the patients who were examined with a  
34 MRI of the brain in Karachi more likely to have findings. The published RIS cohorts are  
35 samples from Brazil, France, Italy, Spain, Turkey, and USA,<sup>2,7,11–17</sup> regions that vary from  
36  
37  
38  
39  
40  
41  
42  
43  
44  
45  
46  
47  
48  
49  
50  
51  
52  
53  
54  
55  
56  
57  
58  
59  
60

1  
2  
3  
4  
5  
6  
7  
8  
9  
10  
11  
12  
13  
14  
15  
16  
17  
18  
19  
20  
21  
22  
23  
24  
25  
26  
27  
28  
29  
30  
31  
32  
33  
34  
35  
36  
37  
38  
39  
40  
41  
42  
43  
44  
45  
46  
47  
48  
49  
50  
51  
52  
53  
54  
55  
56  
57  
58  
59  
60

low to high prevalence.<sup>31</sup> It would be of interest to further evaluate the RIS prevalence in relation to the global MS prevalence.

A limitation of this study is the retrospective design with a single rater that may have led to patients being missed in the screening although a systematic approach was taken. By relying on the clinical evaluations in the screening process it is possible that patients with findings fulfilling the Barkhof criteria were missed. We believe that such gross errors are unlikely since at least one neuroradiologist and in total usually two radiologists evaluated all examinations as part of the clinical diagnostics. This being said, any patient missed would affect the reported frequency significantly due to the low prevalence of RIS. [In terms of losses to follow-up, assuming that the frequency of RIS was the same in the 17 plausible RIS patients lost to follow-up as in those with all data available \(1 case of RIS in 36 patients with plausible RIS\), this would be equivalent to  \$1/36 \times 17 = 0.47\$ . This would increase the RIS frequency to 0.07%, or double the reported frequency to 0.1%, if rounded up to one patient.](#) It is also unexpected that no elderly patients were classified as RIS since the presence of asymptomatic white matter lesions increase with age.<sup>32</sup> This might be due to the clinical information being available in the screening process, making it more likely to classify these white matter changes as ischemic-degenerative. The study period was chosen to be the year 2001 in order to be able to show the natural long-term prognosis for the RIS cases identified. The reasoning for this was that regarding the published RIS cohorts, especially the retrospective cohorts, it is often unclear how the patients were initially identified. The hypothesis was therefore that patients with RIS that do not progress clinically are less likely to be noticed in the clinical setting, decreasing the chance of being included in a cohort, giving the observed cohort a worse prognosis. The study design did unfortunately not prove very helpful since only one case was identified, which limits the possibility of studying the prognosis. Although the study was conducted in 2001, it was conducted on modern 1.5 T



1  
2  
3  
4  
5  
6 MRI machines why the low frequency of RIS findings is hardly explained by technical  
7 reasons.  
8  
9

10  
11  
12 In conclusion this study suggest that RIS, according to present stringent criteria, is an  
13 uncommon finding in a tertiary setting in a region with a high prevalence of MS. In order to  
14 more accurately determine the frequency of RIS in relation to MS prevalence, non-selected  
15 populations in large prospective studies actively involving both radiologists and neurologists  
16 are needed. In order to be able to study the prognosis of these patients large multi-center  
17 studies or case-control studies are recommended.  
18  
19  
20  
21  
22  
23

#### 24 25 26 **ACKNOWLEDGEMENTS**

27 We thank Helena Forssell and Karin Kjellsdotter for their administrative support. We would  
28 also like to acknowledge Sara Shams for valuable comments on the manuscript for this  
29 article.  
30  
31  
32  
33

#### 34 35 36 **FOOT NOTES**

##### 37 **Contributors**

38 TG initiated the study, designed data collection tools, performed the screening of all MRI  
39 examinations, monitored data collection, and drafted the paper. He is guarantor. JM  
40 performed neuroradiological image analysis. TG, JM, MKW, PA and SF all conceived and  
41 designed the study, analysed the data, and revised the paper.  
42  
43  
44  
45  
46  
47

##### 48 **Funding**

49 This research was funded by from Stockholm County Council and Karolinska Institutet  
50 through the regional agreement on medical training and clinical research (ALF grant  
51 20120213).  
52  
53  
54  
55  
56  
57  
58  
59  
60

1  
2  
3  
4  
5  
6  
7  
8  
9  
10  
11  
12  
13  
14  
15  
16  
17  
18  
19  
20  
21  
22  
23  
24  
25  
26  
27  
28  
29  
30  
31  
32  
33  
34  
35  
36  
37  
38  
39  
40  
41  
42  
43  
44  
45  
46  
47  
48  
49  
50  
51  
52  
53  
54  
55  
56  
57  
58  
59  
60

### Competing interests

SF has received honoraria for lectures or educational activities from Allergan, Bayer, Biogen Idec, Merck Serono, Novartis, Sanofi and Teva. All other authors declare no competing interests.

### Ethics approval

This study was conducted with the approval of the regional ethical review board in Stockholm at Karolinska Institutet.

### Patient consent

Obtained.

### Data sharing statement

No additional data are available.

## REFERENCES

- 1 Morris Z, Whiteley WN, Longstreth WT Jr, *et al*. Incidental findings on brain magnetic resonance imaging: systematic review and meta-analysis. *BMJ* 2009;**339**:b3016 doi:10.1136/bmj.b3016
- 2 Okuda DT, Mowry EM, Beheshtian A, *et al*. Incidental MRI anomalies suggestive of multiple sclerosis: the radiologically isolated syndrome [correction appears in *Neurology*. 2009;**72**:1284]. *Neurology* 2009;**72**:800–5. doi:10.1212/01.wnl.0000335764.14513.1a
- 3 Granberg T, Martola J, Kristoffersen-Wiberg M, *et al*. Radiologically isolated

- 1  
2  
3  
4  
5  
6  
7 syndrome – incidental magnetic resonance imaging findings suggestive of multiple  
8 sclerosis, a systematic review. *Mult Scler* 2013;**19**:271–80.  
9  
10 doi:10.1177/1352458512451943  
11
- 12 4 Hakiki B, Goretti B, Portaccio E, *et al*. 'Subclinical MS': follow-up of four cases. *Eur J*  
13 *Neurol* 2008;**15**:858–61. doi:10.1111/j.1468-1331.2008.02155.x  
14  
15
- 16 5 Lebrun C, Blanc F, Brassat D, *et al*. Cognitive function in radiologically isolated  
17 syndrome. *Mult Scler* 2010;**16**:919–25. doi:10.1177/1352458510375707  
18  
19
- 20 6 [Amato MP, Hakiki B, Goretti B, \*et al\*. Association of MRI metrics and cognitive](#)  
21 [impairment in radiologically isolated syndromes. \*Neurology\* 2012;\*\*78\*\*:309–14.](#)  
22 [doi:10.1212/WNL.0b013e31824528c9](#)  
23  
24  
25
- 26 7 De Stefano N, Stromillo ML, Rossi F, *et al*. Improving the characterization of  
27 radiologically isolated syndrome suggestive of multiple sclerosis. *PLoS ONE*  
28 2011;**6**:e19452. doi:10.1371/journal.pone.0019452  
29  
30  
31
- 32 8 [Stromillo ML, Giorgio A, Rossi F, \*et al\*. Brain metabolic changes suggestive of axonal](#)  
33 [damage in radiologically isolated syndrome. \*Neurology\* 2013;\*\*80\*\*:2090–4. doi:](#)  
34 [10.1212/WNL.0b013e318295d707](#)  
35  
36  
37
- 38 9 McDonnell GV, Cabrera-Gomez J, Calne DB, *et al*. Clinical presentation of primary  
39 progressive multiple sclerosis 10 years after the incidental finding of typical  
40 magnetic resonance imaging brain lesions: the subclinical stage of primary  
41 progressive multiple sclerosis may last 10 years. *Mult Scler* 2003;**9**:204–9.  
42  
43  
44  
45  
46  
47 doi:10.1191/1352458503ms890cr
- 48 10 Spain R, Bourdette D. The radiologically isolated syndrome: look (again) before you  
49 treat. *Curr Neurol Neurosci Rep* 2011;**11**:498–506. doi:10.1007/s11910-011-0213-z  
50  
51
- 52 11 Lebrun C, Bensa C, Debouverie M, *et al*. Unexpected multiple sclerosis: follow-up of  
53 30 patients with magnetic resonance imaging and clinical conversion profile. *J*  
54  
55  
56  
57  
58  
59  
60

- 1  
2  
3  
4  
5  
6  
7 *Neurol Neurosurg Ps* 2008;**79**:195–8. doi:10.1136/jnnp.2006.108274
- 8  
9 12 Lebrun C, Bensa C, Debouverie M, *et al.* Association Between Clinical Conversion to  
10 Multiple Sclerosis in Radiologically Isolated Syndrome and Magnetic Resonance  
11 Imaging, Cerebrospinal Fluid, and Visual Evoked Potential: Follow-up of 70 Patients.  
12  
13 *Arch Neurol* 2009;**66**:841–6. doi:10.1001/archneurol.2009.119
- 14  
15  
16 13 Siva A, Saip S, Altintas A, *et al.* Multiple sclerosis risk in radiologically uncovered  
17 asymptomatic possible inflammatory-demyelinating disease. *Mult Scler*  
18  
19 2009;**15**:918–27. doi:10.1177/1352458509106214
- 20  
21  
22 14 Sierra-Marcos A, Mitjana R, Castilló J, *et al.* [Demyelinating lesions as incidental  
23 findings in magnetic resonance imaging: a study of 11 cases with clinico-radiological  
24 follow-up and a review of the literature]. (In Spanish) *Rev Neurol* 2010;**51**:129–34.  
25  
26  
27 15 Okuda DT, Mowry EM, Cree BAC, *et al.* Asymptomatic spinal cord lesions predict  
28 disease progression in radiologically isolated syndrome. *Neurology* 2011;**76**:686–  
29  
30 92. doi:10.1212/WNL.0b013e31820d8b1d
- 31  
32  
33 16 Maia ACM Jr, da Rocha AJ, Barros BR, *et al.* Incidental demyelinating inflammatory  
34 lesions in asymptomatic patients: a Brazilian cohort with radiologically isolated  
35 syndrome and a critical review of current literature. *Arq Neuropsiquiatr* 2012;**70**:5–  
36  
37 11. doi:10.1590/S0004-282X2012000100003
- 38  
39  
40 17 Lebrun C, Page EL, Kantarci O, *et al.* Impact of pregnancy on conversion to clinically  
41 isolated syndrome in a radiologically isolated syndrome cohort. *Mult Scler*  
42  
43 2012;**18**:1297–302. doi:10.1177/1352458511435931
- 44  
45  
46 18 Liu S, Kullnat J, Bourdette D, *et al.* Prevalence of brain magnetic resonance imaging  
47 meeting Barkhof and McDonald criteria for dissemination in space among headache  
48 patients. *Mult Scler* Published Online First: 4 February 2013.  
49  
50  
51  
52  
53  
54  
55  
56  
57  
58  
59  
60

- 1  
2  
3  
4  
5  
6  
7 19 Georgi W. [Multiple sclerosis. Anatomopathological findings of multiple sclerosis in  
8 diseases not clinically diagnosed]. (In German). *Schweiz Med Wochenschr*  
9 1961;**91**:605–7.  
10  
11  
12 20 Gilbert JJ, Sadler M. Unsuspected multiple sclerosis. *Arch Neurol* 1983;**40**:533–6.  
13 doi:10.1001/archneur.1983.04050080033003  
14  
15  
16 21 Engell T. A clinical patho-anatomical study of clinically silent multiple sclerosis. *Acta*  
17 *Neurol Scand* 1989;**79**:428–30. doi:10.1111/j.1600-0404.1989.tb03811.x  
18  
19  
20 22 Johannsen LG, Stenager E, Jensen K. Clinically unexpected multiple sclerosis in  
21 patients with mental disorders. A series of 7301 psychiatric autopsies. *Acta Neurol*  
22 *Belg* 1996;**96**:62–5.  
23  
24  
25 23 Lyoo IK, Seol HY, Byun HS, *et al*. Unsuspected multiple sclerosis in patients with  
26 psychiatric disorders: a magnetic resonance imaging study. *J Neuropsychiatry Clin*  
27 *Neurosci* 1996;**8**:54–9.  
28  
29  
30 24 Katzman GL DA. Incidental findings on brain magnetic resonance imaging from  
31 1000 asymptomatic volunteers. *JAMA* 1999;**282**:36–9. doi:10.1001/jama.282.1.36  
32  
33  
34 25 Weber F, Knopf H. Incidental findings in magnetic resonance imaging of the brains  
35 of healthy young men. *J Neurol Sci* 2006;**240**:81–4. doi:10.1016/j.jns.2005.09.008  
36  
37  
38 26 Hartwigsen G, Siebner HR, Deuschl G, *et al*. Incidental Findings Are Frequent in  
39 Young Healthy Individuals Undergoing Magnetic Resonance Imaging in Brain  
40 Research Imaging Studies. *J Comput Assist Tomo* 2010;**34**:596–600.  
41  
42  
43 doi:10.1097/RCT.0b013e3181d9c2bb  
44  
45  
46 27 Wasay M, Rizvi F, Azeemuddin M, *et al*. Incidental MRI lesions suggestive of multiple  
47 sclerosis in asymptomatic patients in Karachi, Pakistan. *J Neurol Neurosurg*  
48 *Psychiatry* 2011;**82**:83–5. doi:10.1136/jnnp.2009.180000  
49  
50  
51  
52 28 Wasay M, Khatri IA, Khealani B, *et al*. MS in Asian countries. *Int MSJ* 2006;**13**:59–65.  
53  
54  
55  
56  
57  
58  
59  
60

- 1  
2  
3  
4  
5  
6  
7 29 Ahlgren C, Odén A, Lycke J. High nationwide prevalence of multiple sclerosis in  
8 Sweden. *Mult Scler* 2011;**17**:901–8. doi:10.1177/1352458511403794  
9
- 10 30 Barkhof F, Filippi M, Miller DH, *et al.* Comparison of MRI criteria at first presentation  
11 to predict conversion to clinically definite multiple sclerosis. *Brain* 1997;**120**:2059–  
12 69. doi:10.1093/brain/120.11.2059  
13
- 14  
15  
16 [31 Dua T. Atlas: multiple sclerosis resources in the world. Geneva, Switzerland: World  
17 Health Organization; Multiple Sclerosis International Federation 2008.](#)  
18  
19
- 20 32 Vernooij MW, Ikram MA, Tanghe HL, *et al.* Incidental findings on brain MRI in the  
21 general population. *N Engl J Med* 2007;**357**:1821–8. doi:10.1056/NEJMoa070972  
22  
23  
24  
25  
26  
27  
28  
29  
30  
31  
32  
33  
34  
35  
36  
37  
38  
39  
40  
41  
42  
43  
44  
45  
46  
47  
48  
49  
50  
51  
52  
53  
54  
55  
56  
57  
58  
59  
60

1  
2  
3  
4  
5  
6  
7 **Figure 1**

8 Flow chart of the screening process to identify patients with possible RIS  
9

10  
11  
12 **Figure 2**

13  
14 Axial FLAIR images of the identified RIS patient illustrating the multiple T2 hyperintensities  
15 and the contrast-enhancing lesion in the far right image  
16  
17  
18  
19  
20  
21  
22  
23  
24  
25  
26  
27  
28  
29  
30  
31  
32  
33  
34  
35  
36  
37  
38  
39  
40  
41  
42  
43  
44  
45  
46  
47  
48  
49  
50  
51  
52  
53  
54  
55  
56  
57  
58  
59  
60

1  
2  
3  
4  
5  
6  
7  
8  
9  
10  
11  
12  
13  
14  
15  
16  
17  
18  
19  
20  
21  
22  
23  
24  
25  
26  
27  
28  
29  
30  
31  
32  
33  
34  
35  
36  
37  
38  
39  
40  
41  
42  
43  
44  
45  
46  
47  
48  
49  
50  
51  
52  
53  
54  
55  
56  
57  
58  
59  
60

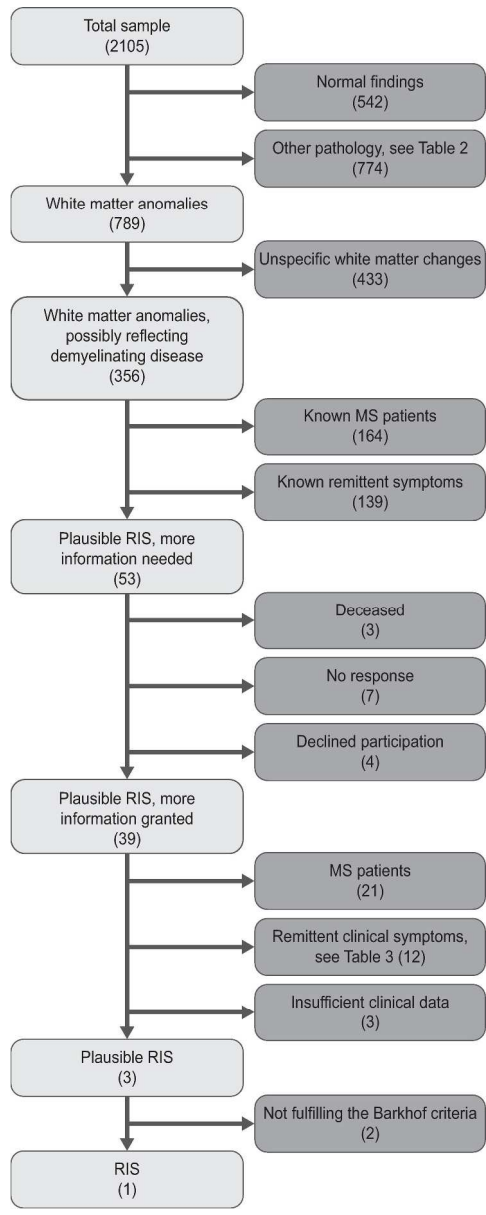

Flow chart of the screening process to identify patients with possible RIS  
209x531mm (300 x 300 DPI)



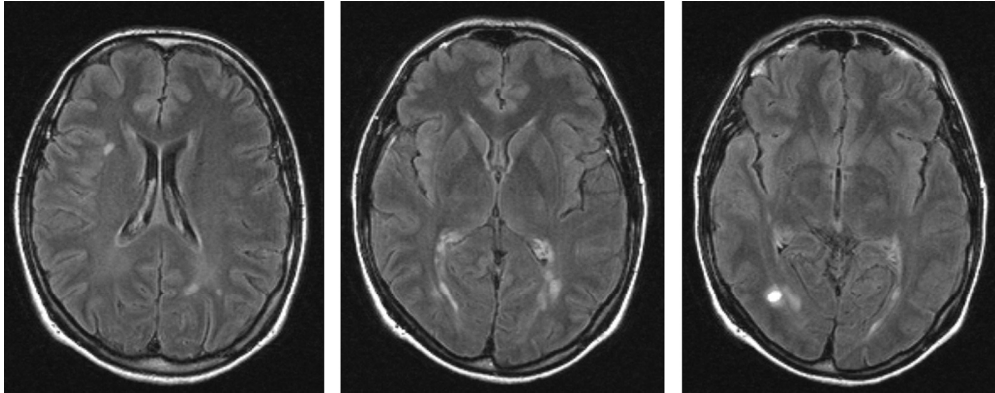

Axial FLAIR images of the identified RIS patient illustrating the multiple T2 hyperintensities and the contrast-enhancing lesion in the far right image  
173x67mm (300 x 300 DPI)

Peer review only

1 STROBE Statement—Checklist of items that should be included in reports of *cohort studies*

|                              | Item No | Recommendation                                                                                                                                                                                                                                                                                                                                                                                                |
|------------------------------|---------|---------------------------------------------------------------------------------------------------------------------------------------------------------------------------------------------------------------------------------------------------------------------------------------------------------------------------------------------------------------------------------------------------------------|
| <b>Title and abstract</b>    | 1       | (a) Indicate the study's design with a commonly used term in the title or the abstract<br>(b) Provide in the abstract an informative and balanced summary of what was done and what was found                                                                                                                                                                                                                 |
| <b>Introduction</b>          |         |                                                                                                                                                                                                                                                                                                                                                                                                               |
| Background/rationale         | 2       | Explain the scientific background and rationale for the investigation being reported                                                                                                                                                                                                                                                                                                                          |
| Objectives                   | 3       | State specific objectives, including any prespecified hypotheses                                                                                                                                                                                                                                                                                                                                              |
| <b>Methods</b>               |         |                                                                                                                                                                                                                                                                                                                                                                                                               |
| Study design                 | 4       | Present key elements of study design early in the paper                                                                                                                                                                                                                                                                                                                                                       |
| Setting                      | 5       | Describe the setting, locations, and relevant dates, including periods of recruitment, exposure, follow-up, and data collection                                                                                                                                                                                                                                                                               |
| Participants                 | 6       | (a) Give the eligibility criteria, and the sources and methods of selection of participants. Describe methods of follow-up<br>(b) For matched studies, give matching criteria and number of exposed and unexposed                                                                                                                                                                                             |
| Variables                    | 7       | Clearly define all outcomes, exposures, predictors, potential confounders, and effect modifiers. Give diagnostic criteria, if applicable                                                                                                                                                                                                                                                                      |
| Data sources/<br>measurement | 8*      | For each variable of interest, give sources of data and details of methods of assessment (measurement). Describe comparability of assessment methods if there is more than one group                                                                                                                                                                                                                          |
| Bias                         | 9       | Describe any efforts to address potential sources of bias                                                                                                                                                                                                                                                                                                                                                     |
| Study size                   | 10      | Explain how the study size was arrived at                                                                                                                                                                                                                                                                                                                                                                     |
| Quantitative variables       | 11      | Explain how quantitative variables were handled in the analyses. If applicable, describe which groupings were chosen and why                                                                                                                                                                                                                                                                                  |
| Statistical methods          | 12      | (a) Describe all statistical methods, including those used to control for confounding<br>(b) Describe any methods used to examine subgroups and interactions<br>(c) Explain how missing data were addressed<br>(d) If applicable, explain how loss to follow-up was addressed<br>(e) Describe any sensitivity analyses                                                                                        |
| <b>Results</b>               |         |                                                                                                                                                                                                                                                                                                                                                                                                               |
| Participants                 | 13*     | (a) Report numbers of individuals at each stage of study—eg numbers potentially eligible, examined for eligibility, confirmed eligible, included in the study, completing follow-up, and analysed<br>(b) Give reasons for non-participation at each stage<br>(c) Consider use of a flow diagram                                                                                                               |
| Descriptive data             | 14*     | (a) Give characteristics of study participants (eg demographic, clinical, social) and information on exposures and potential confounders<br>(b) Indicate number of participants with missing data for each variable of interest<br>(c) Summarise follow-up time (eg, average and total amount)                                                                                                                |
| Outcome data                 | 15*     | Report numbers of outcome events or summary measures over time                                                                                                                                                                                                                                                                                                                                                |
| Main results                 | 16      | (a) Give unadjusted estimates and, if applicable, confounder-adjusted estimates and their precision (eg, 95% confidence interval). Make clear which confounders were adjusted for and why they were included<br>(b) Report category boundaries when continuous variables were categorized<br>(c) If relevant, consider translating estimates of relative risk into absolute risk for a meaningful time period |

|                          |    |                                                                                                                                                                            |
|--------------------------|----|----------------------------------------------------------------------------------------------------------------------------------------------------------------------------|
| Other analyses           | 17 | Report other analyses done—eg analyses of subgroups and interactions, and sensitivity analyses                                                                             |
| <b>Discussion</b>        |    |                                                                                                                                                                            |
| Key results              | 18 | Summarise key results with reference to study objectives                                                                                                                   |
| Limitations              | 19 | Discuss limitations of the study, taking into account sources of potential bias or imprecision. Discuss both direction and magnitude of any potential bias                 |
| Interpretation           | 20 | Give a cautious overall interpretation of results considering objectives, limitations, multiplicity of analyses, results from similar studies, and other relevant evidence |
| Generalisability         | 21 | Discuss the generalisability (external validity) of the study results                                                                                                      |
| <b>Other information</b> |    |                                                                                                                                                                            |
| Funding                  | 22 | Give the source of funding and the role of the funders for the present study and, if applicable, for the original study on which the present article is based              |

\*Give information separately for exposed and unexposed groups.

**Note:** An Explanation and Elaboration article discusses each checklist item and gives methodological background and published examples of transparent reporting. The STROBE checklist is best used in conjunction with this article (freely available on the Web sites of PLoS Medicine at <http://www.plosmedicine.org/>, Annals of Internal Medicine at <http://www.annals.org/>, and Epidemiology at <http://www.epidem.com/>). Information on the STROBE Initiative is available at <http://www.strobe-statement.org>.



**Radiologically isolated syndrome - an uncommon finding at a university clinic in a high-prevalence region for multiple sclerosis**

|                                 |                                                                                                                                                                                                                                                                                                                                                                                                                                                                                                                    |
|---------------------------------|--------------------------------------------------------------------------------------------------------------------------------------------------------------------------------------------------------------------------------------------------------------------------------------------------------------------------------------------------------------------------------------------------------------------------------------------------------------------------------------------------------------------|
| Journal:                        | <i>BMJ Open</i>                                                                                                                                                                                                                                                                                                                                                                                                                                                                                                    |
| Manuscript ID:                  | bmjopen-2013-003531.R1                                                                                                                                                                                                                                                                                                                                                                                                                                                                                             |
| Article Type:                   | Research                                                                                                                                                                                                                                                                                                                                                                                                                                                                                                           |
| Date Submitted by the Author:   | 24-Sep-2013                                                                                                                                                                                                                                                                                                                                                                                                                                                                                                        |
| Complete List of Authors:       | Granberg, Tobias; Karolinska Institutet, Department of Clinical Science, Intervention and Technology<br>Martola, Juha; Karolinska Institutet, Department of Clinical Science, Intervention and Technology<br>Aspelin, Peter; Karolinska Institutet, Department of Clinical Science, Intervention and Technology<br>Kristoffersen Wiberg, Maria; Karolinska Institutet, Department of Clinical Science, Intervention and Technology<br>Fredrikson, Sten; Karolinska Institutet, Department of Clinical Neuroscience |
| <b>Primary Subject Heading</b>: | Neurology                                                                                                                                                                                                                                                                                                                                                                                                                                                                                                          |
| Secondary Subject Heading:      | Radiology and imaging                                                                                                                                                                                                                                                                                                                                                                                                                                                                                              |
| Keywords:                       | Multiple sclerosis < NEUROLOGY, Neuroradiology < RADIOLOGY & IMAGING, Magnetic resonance imaging < RADIOLOGY & IMAGING                                                                                                                                                                                                                                                                                                                                                                                             |
|                                 |                                                                                                                                                                                                                                                                                                                                                                                                                                                                                                                    |

SCHOLARONE™  
Manuscripts

1  
2  
3  
4  
5 **Radiologically isolated syndrome - an uncommon finding at a university clinic in a**  
6  
7 **high-prevalence region for multiple sclerosis**  
8  
9

10  
11 Dr Tobias Granberg<sup>a</sup>, MD; Dr Juha Martola<sup>a</sup>, MD, PhD; Prof Peter Aspelin<sup>a</sup>, MD, PhD;

12  
13 Assoc prof Maria Kristoffersen-Wiberg<sup>a</sup>, MD, PhD; Prof Sten Fredrikson<sup>b</sup>, MD, PhD.

14  
15 <sup>a</sup>Department of Clinical Science, Intervention and Technology, Karolinska Institutet,  
16  
17 Stockholm, Sweden.

18  
19 <sup>b</sup>Department of Clinical Neuroscience, Karolinska Institutet, Stockholm, Sweden.  
20  
21

22  
23  
24  
25 Corresponding author:

26  
27 Tobias Granberg

28  
29 Department of Clinical Science, Intervention and Technology, C1-46

30  
31 Karolinska University Hospital

32  
33 141 86 STOCKHOLM, SWEDEN

34  
35 Email: [tobias.granberg@ki.se](mailto:tobias.granberg@ki.se)

36  
37 Telephone (mobile): +46 700 60 60 87

38  
39 Fax: +46 87 11 48 40  
40  
41

42  
43  
44  
45 Word count: 2925

46  
47 Number of tables: 3

48  
49 Number of figures: 2 (2 black-and-white, 0 in colour)

50  
51 Supplementary files: None

52  
53  
54 Keywords: Radiologically Isolated Syndrome, Multiple Sclerosis, Magnetic Resonance

55  
56 Imaging, Incidental findings, Asymptomatic diseases  
57  
58  
59  
60

**ABSTRACT**

**Objective:** The improved availability of magnetic resonance imaging (MRI) in medicine has led to an increase in incidental findings. Unexpected brain MRI findings suggestive of multiple sclerosis (MS) without typical symptoms of MS were recently defined as radiologically isolated syndrome (RIS). The prevalence of RIS is uncertain. The aim of this study was to determine the prevalence of RIS at a university hospital in a region with a high prevalence for MS and describe the long-term prognosis of the identified patients.

**Design:** Retrospective cohort study conducted in 2012.

**Setting:** All brain MRI examinations performed at Karolinska University Hospital in Huddinge, Stockholm, Sweden during 2001 were retrospectively screened by a single rater for findings fulfilling the Okuda criteria. The sample year was chosen in order to establish the long-term prognosis of the patients identified. The examinations of interest were re-evaluated according to the Barkhof criteria by a neuroradiologist with long experience in MS.

**Participants:** In total 2105 individuals were included in the study. Ages ranged from 0 to 90 years with a median age of 48 years. Only one patient with RIS was identified, equivalent to a prevalence of 0.05% in the studied population, or 0.15% among patients aged 15 to 40 years. The patient with RIS developed symptoms consistent with MS within three months accompanied with radiological progression and was diagnosed with MS.

**Conclusions:** RIS, according to present criteria, is an uncommon finding in a tertiary hospital setting in a high-prevalence region for MS where awareness and clinical suspicion of MS is common. In order to study the prognosis of RIS, multi-center studies, or case-control studies are recommended.

## ARTICLE SUMMARY

### Article focus

- Incidental magnetic resonance imaging findings suggestive of multiple sclerosis in patients without typical symptoms of demyelinating disease is called Radiologically Isolated Syndrome and poses a clinical dilemma for physicians.
- The aim of this study was to investigate the prevalence of the newly defined Radiologically Isolated Syndrome at a university clinic in Stockholm, Sweden.

### Key messages

- Radiologically Isolated Syndrome was an uncommon finding, and was identified only in 1 out of 2105 examined individuals (0.05 %).
- The patient rapidly progressed radiologically and clinically to multiple sclerosis.

### Strengths and limitations of this study

- This is the first study reporting on the frequency of Radiologically Isolated Syndrome in a high-prevalence region for multiple sclerosis.
- The study was a systematic re-evaluation of a yearly sample at a large university clinic.
- The retrospective nature of the study gives the possibility to report on the long-term prognosis for the patients, but also gives rise to losses to follow-up.
- The generalizability of the results to non-tertiary hospital settings and to regions with a

1  
2  
3 lower prevalence of multiple sclerosis is limited.  
4  
5  
6  
7  
8  
9  
10  
11  
12  
13  
14  
15  
16  
17  
18  
19  
20  
21  
22  
23  
24  
25  
26  
27  
28  
29  
30  
31  
32  
33  
34  
35  
36  
37  
38  
39  
40  
41  
42  
43  
44  
45  
46  
47  
48  
49  
50  
51  
52  
53  
54  
55  
56  
57  
58  
59  
60

For peer review only



## INTRODUCTION

Magnetic resonance imaging (MRI) has revolutionised our ability to image the central nervous system and it has become readily accessible in clinical practice. With the improved availability and sensitivity of MRI there is an increase in incidental findings.<sup>1</sup> In 2009, Okuda and colleagues defined incidental MRI findings suggestive of multiple sclerosis (MS) without typical MS symptoms as Radiologically Isolated Syndrome (RIS).<sup>2</sup> This has led to an increased awareness of this condition and a convergence in terminology.<sup>3</sup>

Since the definition of RIS, studies by several groups have shown that there is a close association between RIS and MS. Patients with RIS often have a subclinical cognitive impairment with a similar test profile of deficits compared to patients with MS.<sup>4-6</sup> The association of RIS and MS is also strengthened in that both patient groups show similarities in both qualitative and quantitative MRI measurements.<sup>6-8</sup> There are case reports with follow-ups of up to 10 years,<sup>4,9,10</sup> and the range of mean follow-up times in the published cohorts are 2.4 to 7 years.<sup>2,11-17</sup> These studies show that roughly two-thirds progress radiologically and one-third develop clinical symptoms, and thereby convert to clinically isolated syndrome or MS, during their follow-up times.<sup>3</sup> This suggests that RIS in some cases may be considered to be preclinical MS. The patients with RIS is therefore of particular interest to study in a pathophysiological aspect since it may shed light on early changes that precedes the onset of classical MS symptoms.

Headache is the most common reason for performing the initial MRI unveiling RIS, but it is unclear if there is a causative relationship between the incidental MRI findings and the headaches.<sup>3</sup> Recently a study by Liu and colleagues showed that among patients undergoing a MRI of the brain due to headaches, MRI findings fulfilling the Barkhof criteria are common.

1  
2  
3 Depending on the definition of juxtacortical and periventricular, 2.4–7.1% of the patients  
4 fulfilled the Barkhof criteria.<sup>18</sup>  
5  
6  
7

8  
9 Incidental MS findings are previously known from autopsy studies from the late 20<sup>th</sup> century  
10 indicating a frequency of unexpected post-mortem MS findings in the range of 0.08–0.2%.<sup>19–</sup>  
11

12  
13  
14 <sup>22</sup> The incidence and prevalence of the newly defined RIS is, however, currently unknown.<sup>3</sup> In  
15  
16 2009 Morris and colleagues published a meta-analysis of 16 studies including 15,559 healthy  
17  
18 control subjects that reported nine cases of “definite demyelination” and four cases of  
19  
20 “possible demyelination” corresponding to a frequency of 0.06% and 0.03% respectively.<sup>1</sup>  
21

22  
23 There is unfortunately no report on the clinical history or neurological examination of these  
24  
25 cases why the results cannot be assumed to reflect RIS. Instead the results of five original  
26  
27 articles, identified as the most relevant, are described below.  
28  
29

30  
31  
32 An American study published in 1996, described 23 patients with MRI findings highly  
33  
34 suggestive of MS (according to Paty’s classification) in a population of 2,783 psychiatric  
35  
36 patients. However, 13 patients had neurological symptoms that were not further specified,  
37  
38 which gives a possible asymptomatic frequency of roughly 0.4%. It is unknown if these  
39  
40 patients had any neurological findings that would exclude them from a RIS diagnosis.<sup>23</sup> The  
41

42  
43 results are nonetheless interesting since psychiatric symptoms have frequently been reported  
44  
45 as the original indication for performing the MRI examination that unveiled the RIS.<sup>3</sup> A  
46  
47 second American study published in 1999 showed that among 1,000 asymptomatic subjects,  
48  
49 there were three persons (0.3%) with findings classified as possible demyelinating disease.<sup>24</sup>  
50

51  
52 A German study published in 2006 described a cohort of 2,536 young male military recruits  
53  
54 in which one person (0.04%) had findings suggestive of demyelinating disease, but it is not  
55  
56 specified if this person had any neurological symptoms or findings.<sup>25</sup> A second German study  
57  
58 was published in 2010, which showed that of 206 healthy young volunteers two (1.0%) had  
59  
60

1  
2  
3 multiple white matter lesions, but it is unclear whether the findings fulfilled the Barkhof  
4  
5 criteria.<sup>26</sup>  
6  
7

8  
9  
10 The first study reporting on the frequency of RIS since its definition was a hospital-based  
11  
12 study from Pakistan published in 2011. It revealed that out of 864 persons in the ages 15 to 40  
13  
14 years there were six cases (0.7%) of incidental MRI findings suggestive of MS in patients  
15  
16 without relapsing neurological symptoms or pathological neurological findings.<sup>27</sup> This study  
17  
18 reported a surprisingly high frequency of such findings in a region with a low prevalence of  
19  
20 MS (<5 per 100,000 population).<sup>28</sup> In comparison the estimated prevalence of MS in Sweden,  
21  
22 where the present study was conducted, is 189 per 100,000 population.<sup>29</sup> Recently a second  
23  
24 study using the RIS criteria was published in 2013 that demonstrated the frequency of RIS  
25  
26 findings in asymptomatic relatives to MS patients and healthy controls. It showed that 2 out of  
27  
28 68 (2.9%) healthy relatives of MS patients and that 2 out of 82 (2.4%) of the healthy controls  
29  
30 fulfilled the Okuda criteria.<sup>30</sup>  
31  
32  
33  
34  
35

36  
37 In conclusion there has not been any study reporting on the hospital-based prevalence of RIS  
38  
39 in a high-prevalence region for MS since the definition of RIS. This study aims to clarify in  
40  
41 what frequency RIS findings can be expected in a tertiary hospital setting in a high-prevalence  
42  
43 region for MS and depict the long-term prognosis of RIS in the patients identified.  
44  
45  
46

## 47 **METHODS**

### 48 **Study population and ethical approval**

49  
50 The study sample in this retrospective study conducted in 2012 is based on the digital  
51  
52 radiological information system and digital patient charts at Karolinska University Hospital,  
53  
54 Huddinge (formerly Huddinge University Hospital), Stockholm, Sweden. The hospital is a  
55  
56 tertiary referral hospital for the greater southern Stockholm area with a population of 800,000  
57  
58  
59  
60

1  
2  
3 inhabitants. Although the study was conducted in 2012, the sample year was chosen to be  
4  
5 2001, when both the patient charts and the radiological data were fully digitalised, in order to  
6  
7 be able to show the natural long-term prognosis over the past 11 years for any RIS cases  
8  
9 identified. All persons undergoing a brain MRI at the hospital during the sample year were  
10  
11 included in the study. The study was approved by the regional ethical review board in  
12  
13 Stockholm at Karolinska Institutet, which allowed a general screening of the examinations  
14  
15 described above, and written informed consent was obtained according to the approval in  
16  
17 those cases where more information was necessary through access of the clinical patient  
18  
19 charts.  
20  
21  
22  
23  
24

### 25 **Screening method**

26  
27 The screening of the study population was made systematically by one physician at the  
28  
29 radiology department with previous experience of radiological research (TG). All  
30  
31 documentation from the MRI examinations from 2001 was available to the screener and read  
32  
33 to full extent. The material included both the query, the clinical information in the referral  
34  
35 (clinical history, symptoms, and findings) as well as the radiological findings according to the  
36  
37 regular clinical radiological assessment.  
38  
39  
40  
41  
42

### 43 **MRI examinations**

44  
45 All MRI examinations were performed in the regular clinical setting in one of two 1.5 T MRI  
46  
47 machines, Siemens Magnetom Vision and Symphony (Siemens Medical Systems GmbH,  
48  
49 Erlangen, Germany). The MRI examinations were performed according to standard clinical  
50  
51 protocols depending on the original clinical query and white matter anomalies were in most  
52  
53 cases further characterised with the standardised MS MRI protocol used at the clinic  
54  
55 described in Table 1.  
56  
57  
58  
59  
60

**Table 1**

MRI parameters of the standardised MS protocol

| Sequence  | Plane    | SLT<br>(mm) | TR<br>(ms) | TE<br>(ms) | TI<br>(ms) | FA<br>(°) |
|-----------|----------|-------------|------------|------------|------------|-----------|
| T1 MPRAGE | Axial    | 1.5         | 13.5       | 7          | 300        | 15        |
| PD TSE    | Axial    | 3.0         | 4761       | 22         | -          | 180       |
| T2 TSE    | Axial    | 3.0         | 4761       | 90         | -          | 180       |
| T2 TSE*   | Sagittal | 4.0         | 3500       | 96         | -          | 180       |
| FLAIR*    | Axial    | 5.0         | 9000       | 110        | 2500       | 180       |
| T1 SE*    | Axial    | 5.0         | 570        | 14         | -          | 90        |

\*Acquired post-gadolinium-DTPA contrast media.

FA, flip angle; FLAIR, fluid attenuated inversion recovery; MPRAGE, three-dimensional magnetization prepared rapid acquisition gradient echo; PD, proton density; SE, spin echo; SLT, slice thickness; TE, echo time; TI, inversion time; TR, repetition time; TSE, turbo spin echo.

**Radiological assessment**

All examinations had been reviewed, signed, and contra-signed as part of the regular clinical radiological routine. At least one of the clinical reviewers was a specialist in neuroradiology.

The examinations identified with possible RIS findings in the screening process were re-evaluated according to the Barkhof criteria by another neuroradiologist (JM) with long experience of classifying MS-like findings.

**Clinical assessment**

The referring doctor conducted the initial clinical assessments. All patients that were identified as possible RIS cases in the screening had been examined by a neurologists as part of the following clinical investigation. All patients diagnosed with MS received their diagnosis according to contemporaneous diagnostic criteria after careful investigation lead by a neurologist with experience of MS.

**RESULTS****Prevalence of RIS**

During the year of 2001 a total of 2105 individuals had at least one MRI examination of the brain at Karolinska University Hospital in Huddinge, Stockholm, Sweden. Among the

patients there were 903 men (43%) and 1202 women (57%) with an age span of 0 to 90 years with 669 persons being between 15 and 40 years of age. Mean age was 46.2 years and median age was 48 years. The following results are also schematically described in Figure 1. Out of all patients 542 had normal findings. The spectrum of findings is presented in Table 2. Common findings besides white matter changes were tumours, atrophy, infarctions, and sinusitis.

**Table 2**

Overview of MRI findings (n)

|                                                         |             |
|---------------------------------------------------------|-------------|
| <b>Within normal limits</b>                             | <b>542</b>  |
| <b>Cerebrovascular disorders</b>                        | <b>326</b>  |
| - Aneurysm                                              | 8           |
| - Carotid dissection or occlusion                       | 12          |
| - Cavernous malformation                                | 19          |
| - Cerebral contusions                                   | 4           |
| - Cortical infarction                                   | 89          |
| - Developmental venous anomaly                          | 29          |
| - Lacunar infarction                                    | 133         |
| - Intracerebral haemorrhage                             | 15          |
| - Cerebral venous sinus thrombosis                      | 5           |
| - Subarachnoid haemorrhage                              | 3           |
| - Subdural hematoma or hygroma                          | 6           |
| - Other                                                 | 3           |
| <b>White matter and neurodegenerative disorders</b>     | <b>1143</b> |
| - Atrophy                                               | 285         |
| - Basal ganglia disorders                               | 12          |
| - Hydrocephalus                                         | 20          |
| - Marked perivascular spaces                            | 37          |
| - Possibly inflammatory white matter changes            | 356         |
| - Unspecific or degenerative white matter changes       | 433         |
| <b>Infectious, inflammatory and metabolic disorders</b> | <b>88</b>   |
| - Cerebral abscess                                      | 7           |
| - Congenital metabolic disorders                        | 4           |

|                                         |            |
|-----------------------------------------|------------|
| - Encephalitis                          | 10         |
| - Meningitis                            | 15         |
| - Optical neuritis                      | 37         |
| - Vasculitis                            | 4          |
| - Other                                 | 11         |
| <b>Neoplasms</b>                        | <b>311</b> |
| - Acoustic neuroma                      | 19         |
| - Glioma                                | 21         |
| - Meningioma                            | 44         |
| - Metastasis                            | 18         |
| - Pituitary adenoma                     | 31         |
| - Unspecified or other type of neoplasm | 46         |
| <b>Cysts and malformations</b>          | <b>74</b>  |
| - Arachnoid cyst                        | 24         |
| - Empty sella                           | 9          |
| - Malformation or dysplasia             | 16         |
| - Parenchymal cyst                      | 5          |
| - Pineal cyst                           | 13         |
| - Pituitary cyst                        | 7          |
| <b>Sinonasal and orbital disorders</b>  | <b>191</b> |
| - Sinusitis                             | 164        |
| - Mastoiditis                           | 23         |
| - Other                                 | 4          |

In total 789 patients had white matter anomalies (not involving those caused by other diseases). Out of these patients, 433 had unspecific white matter changes that did not fulfil the Barkhof criteria (solitary findings) or had a more likely explanation; such as an ischemic-degenerative pattern in elderly and/or patients with known severe cardiovascular disease. Out of the 356 patients with white matter changes possibly reflecting demyelinating disease, 158 patients were known to have MS and 6 received their MS diagnosis as part of the investigation in question. Out of the 192 remaining patients 139 were reported to have apparent neurological symptoms in the referral that would exclude the findings from being classified as RIS according to the B criteria in the Okuda classification, but where it was

unclear if they had already gotten a diagnosis of Clinically Isolated Syndrome or MS. After this screening only 53 patients remained with findings that were plausible RIS but where more clinical information was needed. In compliance with the ethical approval these patients were asked for written informed consent in order for us to evaluate their clinical patient charts.

Of these 53 patients where further information was needed, 3 patients were deceased, 7 did not respond and 4 declined participation. The patient charts of the remaining 39 persons that gave their informed consent were then examined in order to better understand the patients' clinical history, symptoms and neurological findings. This additional information revealed that 21 had been diagnosed with MS. Another 12 had intermittent clinical symptoms dismissing a RIS classification, presented in Table 3, but where the patients had not yet received a diagnosis of MS. In 3 cases there was insufficient clinical data to draw a conclusion. In the end, 3 patients with plausible RIS remained and after neuroradiological assessment 1 patient was classified as having RIS. This is equivalent to a prevalence of 0.05% in the studied population and 0.15% among the patients in the ages of 15 to 40 years.

**Table 3**

Presenting symptoms in the 12 patients not classified as RIS

| Sex | Age (years) | Symptoms                                 |
|-----|-------------|------------------------------------------|
| F   | 25          | Optical neuritis, Lhermitte's sign       |
| F   | 26          | Diplopia, hemiparesis                    |
| F   | 39          | Optical neuritis, facial hemidysesthesia |
| F   | 43          | Optical neuritis                         |
| F   | 47          | Recurrent hemidysesthesia                |
| F   | 58          | Trigeminal neuralgia                     |
| F   | 62          | Hemidysesthesia, facial paralysis        |
| F   | 62          | Hemidysesthesia                          |
| M   | 18          | Severe vertigo, ataxia                   |
| M   | 18          | Lhermitte's sign                         |
| M   | 27          | Diplopia, vertigo, dysesthesia           |
| M   | 44          | Hypesthesia                              |

F, female; M, male.



### Case description

The patient with RIS was a 43 year-old woman without any neurological symptoms or any history of neurological disorders except for migraine since more than 10 years. A neurological examination did not reveal any pathological findings. She had good effect of triptanes. Due to her long history of migraine and still frequent attacks she was referred for a MRI of the brain in February of 2001. The scan showed 15 supratentorial T2 lesions, out of which 12 were periventricular and 2 were juxtacortical. Gadolinium enhanced sequences showed enhancement in one of the lesions. Thus three out of four of the Barkhof criteria were fulfilled.<sup>31</sup> Images obtained from this subject can be seen in Figure 2. Because of the MRI findings, she was referred to a neurologist in March where a second neurological examination was normal. CSF analysis revealed oligoclonal bands and an elevated IgG index. In May she returned to the neurological clinic due to a sudden onset of intermittent bilateral symptoms in arms and hands. A new neurological examination revealed bilateral tremor and dysmetria. A new MRI in June showed three new non-enhancing supratentorial lesions. She was diagnosed with MS and at a follow-up in September the symptoms in the upper extremities had worsened. She received prednisolone treatment and was started on interferon beta therapy. In November she had Lhermitte's sign and a MRI showed a cervical spine lesion. Except for one occurrence of lower extremity symptoms in 2005, she has remained relapse free as of the latest neurological follow-up in March 2013.

### DISCUSSION

This study shows that RIS, according to present stringent criteria, is an uncommon finding, in a tertiary radiological clinic in a region with a high prevalence of MS, where awareness and clinical suspicion of MS is common.<sup>29</sup> The RIS frequency of 0.05% is in alignment with previous anatomo-pathological studies and earlier MRI studies have shown that "incidental"

1  
2  
3 or “asymptomatic” MS is relatively uncommon.<sup>19–26</sup> The only hospital-based reported  
4  
5 frequency of RIS since its definition, 0·7%, comes from a report from the Karachi region of  
6  
7 Pakistan.<sup>27</sup> In contrast, the current study reports a frequency of RIS of 0·15% in the same age  
8  
9 group. Although the studies are not directly comparable due to dissimilarities in methodology,  
10  
11 it is of interest to consider the difference in results further. A possible explanation may be the  
12  
13 high awareness of MS in Sweden and frequent clinical suspicion when referring patients for  
14  
15 MRI. The results could possibly also be affected by the fact that a majority of the referrals to  
16  
17 the radiological clinic participating in this study comes from the in-hospital clinics, whilst  
18  
19 patients initially seeking their family practitioner might have been referred to a non-tertiary  
20  
21 radiological clinic for an MRI. How the fact that the study site is a tertiary setting has affected  
22  
23 the reported prevalence is therefore hard to appreciate. Another explanation for the difference  
24  
25 might be that the study from Pakistan was a semi-retrospective and -prospective study, which  
26  
27 might have been more effective in identifying patients with these findings and suffering from  
28  
29 less losses to follow-up. In the study from Pakistan there were also fewer patients examined in  
30  
31 a more densely populated area, likely mirroring a lower availability of MRI in the Karachi  
32  
33 region than the Stockholm region, perhaps making the patients who were examined with a  
34  
35 MRI of the brain in Karachi more likely to have findings. The published RIS cohorts are  
36  
37 samples from Brazil, France, Italy, Spain, Turkey, and USA,<sup>2,7,11–17</sup> regions that vary from  
38  
39 low to high prevalence.<sup>32</sup> It would be of interest to further evaluate the RIS prevalence in  
40  
41 relation to the global MS prevalence.  
42  
43  
44  
45  
46  
47  
48

49  
50 Interestingly, the study published by Gabelic and colleagues shows that 2·9% of the healthy  
51  
52 relatives of MS patients and 2·4% of the healthy controls in their study fulfilled Okuda’s RIS  
53  
54 criteria.<sup>30</sup> This might indicate that the frequency of RIS findings would paradoxically be  
55  
56 higher in the general population than found in the current study. However, differences in  
57  
58 methodologies and demography of the research subjects limit the comparability of the current  
59  
60

1  
2  
3 study to Gabelic's work. The studies were not performed in the same region and with  
4  
5 different aims. While this study aimed to describe the hospital-based frequency of RIS  
6  
7 without limitations in terms of age groups, Gabelic's study was performed in a different  
8  
9 country and studied the frequency of RIS in healthy hospital personnel and volunteers  
10  
11 recruited through newspaper advertisement within a homogenous age group with a mean age  
12  
13 of 40 years.  
14

15  
16  
17  
18 A limitation of this study is the retrospective design with a single rater that may have led to  
19  
20 patients being missed in the screening although a systematic approach was taken. By relying  
21  
22 on the clinical evaluations in the screening process it is possible that patients with findings  
23  
24 fulfilling the Barkhof criteria were missed. We believe that such gross errors are unlikely  
25  
26 since at least one neuroradiologist and in total usually two radiologists evaluated all  
27  
28 examinations as part of the clinical diagnostics. This being said, any patient missed would  
29  
30 affect the reported frequency significantly due to the low prevalence of RIS. In terms of losses  
31  
32 to follow-up, assuming that the frequency of RIS was the same in the 17 plausible RIS  
33  
34 patients lost to follow-up as in those with all data available (1 case of RIS in 36 patients with  
35  
36 plausible RIS), this would be equivalent to  $1/36 \times 17 = 0.47$ . This would increase the RIS  
37  
38 frequency to 0.07%, or double the reported frequency to 0.1%, if rounded up to one patient. It  
39  
40 is also unexpected that no elderly patients were classified as RIS since the presence of  
41  
42 asymptomatic white matter lesions increase with age.<sup>33</sup> This might be due to the clinical  
43  
44 information being available in the screening process, making it more likely to classify these  
45  
46 white matter changes as ischemic-degenerative. The study period was chosen to be the year  
47  
48 2001 in order to be able to show the natural long-term prognosis for the RIS cases identified  
49  
50 with a potential follow-up period of 11 years. The reasoning for this was that regarding the  
51  
52 published RIS cohorts, especially the retrospective cohorts, it is often unclear how the patients  
53  
54 were initially identified. The hypothesis was therefore that patients with RIS that do not  
55  
56  
57  
58  
59  
60

1  
2  
3 progress clinically are less likely to be noticed in the clinical setting, decreasing the chance of  
4 being included in a cohort, giving the observed cohort a worse prognosis. The study design  
5 did unfortunately not prove very helpful since only one case was identified, which limits the  
6 possibility of studying the prognosis. Although the study was conducted in 2001, it was  
7 conducted on modern 1.5 T MRI machines why the low frequency of RIS findings is hardly  
8 explained by technical reasons.  
9  
10  
11  
12  
13  
14  
15  
16  
17

18 In conclusion this study suggest that RIS, according to present stringent criteria, is an  
19 uncommon finding in a tertiary hospital setting in a region with a high prevalence of MS. In  
20 order to more accurately determine the frequency of RIS in relation to MS prevalence, non-  
21 selected populations in large prospective studies actively involving both radiologists and  
22 neurologists are needed. In order to be able to study the prognosis of these patients large  
23 multi-center studies or case-control studies are recommended.  
24  
25  
26  
27  
28  
29  
30  
31  
32  
33

### 34 ACKNOWLEDGEMENTS

35  
36 We thank Helena Forssell and Karin Kjellsdotter for their administrative support. We would  
37 also like to acknowledge Sara Shams for valuable comments on the manuscript for this  
38 article.  
39  
40  
41  
42  
43  
44

### 45 FOOT NOTES

#### 47 Contributors

48  
49 TG initiated the study, designed data collection tools, performed the screening of all MRI  
50 examinations, monitored data collection, and drafted the paper. He is guarantor. JM  
51 performed neuroradiological image analysis. TG, JM, MKW, PA and SF all conceived and  
52 designed the study, analysed the data, and revised the paper.  
53  
54  
55  
56  
57  
58  
59  
60

### Funding

This research was funded by from Stockholm County Council and Karolinska Institutet through the regional agreement on medical training and clinical research (ALF grant 20120213).

### Competing interests

SF has received honoraria for lectures or educational activities from Allergan, Bayer, Biogen Idec, Merck Serono, Novartis, Sanofi and Teva. All other authors declare no competing interests.

### Ethics approval

This study was conducted with the approval of the regional ethical review board in Stockholm at Karolinska Institutet.

### Patient consent

Obtained.

### Data sharing statement

No additional data are available.

## REFERENCES

- 1 Morris Z, Whiteley WN, Longstreth WT Jr, *et al.* Incidental findings on brain magnetic resonance imaging: systematic review and meta-analysis. *BMJ* 2009;**339**:b3016  
doi:10.1136/bmj.b3016
- 2 Okuda DT, Mowry EM, Beheshtian A, *et al.* Incidental MRI anomalies suggestive of multiple sclerosis: the radiologically isolated syndrome [correction appears in *Neurology*.

- 2009;**72**:1284]. *Neurology* 2009;**72**:800–5. doi:10.1212/01.wnl.0000335764.14513.1a
- 3 Granberg T, Martola J, Kristoffersen-Wiberg M, *et al.* Radiologically isolated syndrome  
4 – incidental magnetic resonance imaging findings suggestive of multiple sclerosis, a  
5 systematic review. *Mult Scler* 2013;**19**:271–80. doi:10.1177/1352458512451943
- 6  
7  
8  
9  
10  
11  
12  
13  
14  
15  
16  
17  
18  
19  
20  
21  
22  
23  
24  
25  
26  
27  
28  
29  
30  
31  
32  
33  
34  
35  
36  
37  
38  
39  
40  
41  
42  
43  
44  
45  
46  
47  
48  
49  
50  
51  
52  
53  
54  
55  
56  
57  
58  
59  
60
- 4 Hakiki B, Goretti B, Portaccio E, *et al.* ‘Subclinical MS’: follow-up of four cases. *Eur J  
Neurol* 2008;**15**:858–61. doi:10.1111/j.1468-1331.2008.02155.x
- 5 Lebrun C, Blanc F, Brassat D, *et al.* Cognitive function in radiologically isolated  
6 syndrome. *Mult Scler* 2010;**16**:919–25. doi:10.1177/1352458510375707
- 6 Amato MP, Hakiki B, Goretti B, *et al.* Association of MRI metrics and cognitive  
7 impairment in radiologically isolated syndromes. *Neurology* 2012;**78**:309–14.  
8 doi:10.1212/WNL.0b013e31824528c9
- 7 De Stefano N, Stromillo ML, Rossi F, *et al.* Improving the characterization of  
8 radiologically isolated syndrome suggestive of multiple sclerosis. *PLoS ONE*  
9 2011;**6**:e19452. doi:10.1371/journal.pone.0019452
- 8 Stromillo ML, Giorgio A, Rossi F, *et al.* Brain metabolic changes suggestive of axonal  
9 damage in radiologically isolated syndrome. *Neurology* 2013;**80**:2090–4. doi:  
10.1212/WNL.0b013e318295d707
- 9 McDonnell GV, Cabrera-Gomez J, Calne DB, *et al.* Clinical presentation of primary  
10 progressive multiple sclerosis 10 years after the incidental finding of typical magnetic  
11 resonance imaging brain lesions: the subclinical stage of primary progressive multiple  
12 sclerosis may last 10 years. *Mult Scler* 2003;**9**:204–9. doi:10.1191/1352458503ms890cr
- 10 Spain R, Bourdette D. The radiologically isolated syndrome: look (again) before you  
11 treat. *Curr Neurol Neurosci Rep* 2011;**11**:498–506. doi:10.1007/s11910-011-0213-z
- 11 Lebrun C, Bensa C, Debouverie M, *et al.* Unexpected multiple sclerosis: follow-up of 30  
12 patients with magnetic resonance imaging and clinical conversion profile. *J Neurol  
Neurosurg Ps* 2008;**79**:195–8. doi:10.1136/jnnp.2006.108274

- 1  
2  
3 12 Lebrun C, Bensa C, Debouverie M, *et al.* Association Between Clinical Conversion to  
4 Multiple Sclerosis in Radiologically Isolated Syndrome and Magnetic Resonance  
5 Imaging, Cerebrospinal Fluid, and Visual Evoked Potential: Follow-up of 70 Patients.  
6  
7  
8  
9  
10 *Arch Neurol* 2009;**66**:841–6. doi:10.1001/archneurol.2009.119
- 11  
12 13 Siva A, Saip S, Altintas A, *et al.* Multiple sclerosis risk in radiologically uncovered  
13 asymptomatic possible inflammatory-demyelinating disease. *Mult Scler* 2009;**15**:918–27.  
14  
15  
16  
17  
18  
19 14 Sierra-Marcos A, Mitjana R, Castelló J, *et al.* [Demyelinating lesions as incidental  
20 findings in magnetic resonance imaging: a study of 11 cases with clinico-radiological  
21 follow-up and a review of the literature]. (In Spanish) *Rev Neurol* 2010;**51**:129–34.  
22  
23  
24  
25 15 Okuda DT, Mowry EM, Cree BAC, *et al.* Asymptomatic spinal cord lesions predict  
26 disease progression in radiologically isolated syndrome. *Neurology* 2011;**76**:686–92.  
27  
28  
29  
30  
31  
32 16 Maia ACM Jr, da Rocha AJ, Barros BR, *et al.* Incidental demyelinating inflammatory  
33 lesions in asymptomatic patients: a Brazilian cohort with radiologically isolated  
34 syndrome and a critical review of current literature. *Arq Neuropsiquiatr* 2012;**70**:5–11.  
35  
36  
37  
38  
39  
40  
41 17 Lebrun C, Page EL, Kantarci O, *et al.* Impact of pregnancy on conversion to clinically  
42 isolated syndrome in a radiologically isolated syndrome cohort. *Mult Scler*  
43  
44  
45 2012;**18**:1297–302. doi:10.1177/1352458511435931
- 46  
47 18 Liu S, Kullnat J, Bourdette D, *et al.* Prevalence of brain magnetic resonance imaging  
48 meeting Barkhof and McDonald criteria for dissemination in space among headache  
49 patients. *Mult Scler* Published Online First: 4 February 2013.  
50  
51  
52  
53  
54  
55  
56 19 Georgi W. [Multiple sclerosis. Anatomopathological findings of multiple sclerosis in  
57 diseases not clinically diagnosed]. (In German). *Schweiz Med Wochenschr* 1961;**91**:605–  
58  
59  
60

- 1  
2  
3 7.  
4  
5 20 Gilbert JJ, Sadler M. Unsuspected multiple sclerosis. *Arch Neurol* 1983;**40**:533–6.  
6  
7 doi:10.1001/archneur.1983.04050080033003  
8  
9  
10 21 Engell T. A clinical patho-anatomical study of clinically silent multiple sclerosis. *Acta*  
11  
12 *Neurol Scand* 1989;**79**:428–30. doi:10.1111/j.1600-0404.1989.tb03811.x  
13  
14 22 Johannsen LG, Stenager E, Jensen K. Clinically unexpected multiple sclerosis in patients  
15  
16 with mental disorders. A series of 7301 psychiatric autopsies. *Acta Neurol Belg*  
17  
18 1996;**96**:62–5.  
19  
20 23 Lyoo IK, Seol HY, Byun HS, *et al.* Unsuspected multiple sclerosis in patients with  
21  
22 psychiatric disorders: a magnetic resonance imaging study. *J Neuropsychiatry Clin*  
23  
24 *Neurosci* 1996;**8**:54–9.  
25  
26  
27 24 Katzman GL DA. Incidental findings on brain magnetic resonance imaging from 1000  
28  
29 asymptomatic volunteers. *JAMA* 1999;**282**:36–9. doi:10.1001/jama.282.1.36  
30  
31 25 Weber F, Knopf H. Incidental findings in magnetic resonance imaging of the brains of  
32  
33 healthy young men. *J Neurol Sci* 2006;**240**:81–4. doi:10.1016/j.jns.2005.09.008  
34  
35  
36 26 Hartwigsen G, Siebner HR, Deuschl G, *et al.* Incidental Findings Are Frequent in Young  
37  
38 Healthy Individuals Undergoing Magnetic Resonance Imaging in Brain Research  
39  
40 Imaging Studies. *J Comput Assist Tomo* 2010;**34**:596–600.  
41  
42 doi:10.1097/RCT.0b013e3181d9c2bb  
43  
44  
45 27 Wasay M, Rizvi F, Azeemuddin M, *et al.* Incidental MRI lesions suggestive of multiple  
46  
47 sclerosis in asymptomatic patients in Karachi, Pakistan. *J Neurol Neurosurg Psychiatry*  
48  
49 2011;**82**:83–5. doi:10.1136/jnnp.2009.180000  
50  
51  
52 28 Wasay M, Khatri IA, Khealani B, *et al.* MS in Asian countries. *Int MS J* 2006;**13**:59–65.  
53  
54  
55 29 Ahlgren C, Odén A, Lycke J. High nationwide prevalence of multiple sclerosis in  
56  
57 Sweden. *Mult Scler* 2011;**17**:901–8. doi:10.1177/1352458511403794  
58  
59 30 Gabelic T, Ramasamy DP, Weinstock-Guttman B, *et al.* Prevalence of Radiologically  
60



1  
2  
3 Isolated Syndrome and White Matter Signal Abnormalities in Healthy Relatives of  
4 Multiple Sclerosis Patients. *Am J Neuroradiol* Published Online First: 25 July 2013.  
5  
6  
7 doi:10.3174/ajnr.A3653  
8

- 9  
10 31 Barkhof F, Filippi M, Miller DH, *et al.* Comparison of MRI criteria at first presentation  
11 to predict conversion to clinically definite multiple sclerosis. *Brain* 1997;**120**:2059–69.  
12  
13 doi:10.1093/brain/120.11.2059  
14  
15  
16 32 Dua T. Atlas: multiple sclerosis resources in the world. Geneva, Switzerland: World  
17 Health Organization; Multiple Sclerosis International Federation 2008.  
18  
19  
20 33 Vernooij MW, Ikram MA, Tanghe HL, *et al.* Incidental findings on brain MRI in the  
21 general population. *N Engl J Med* 2007;**357**:1821–8. doi:10.1056/NEJMoa070972  
22  
23  
24  
25  
26  
27  
28  
29  
30  
31  
32  
33  
34  
35  
36  
37  
38  
39  
40  
41  
42  
43  
44  
45  
46  
47  
48  
49  
50  
51  
52  
53  
54  
55  
56  
57  
58  
59  
60

1  
2  
3 **Figure 1**

4  
5 Flow chart of the screening process to identify patients with possible RIS  
6  
7

8  
9  
10 **Figure 2**

11 Axial FLAIR images of the identified RIS patient illustrating the multiple T2 hyperintensities  
12 and the contrast-enhancing lesion in the far right image  
13  
14  
15  
16  
17  
18  
19  
20  
21  
22  
23  
24  
25  
26  
27  
28  
29  
30  
31  
32  
33  
34  
35  
36  
37  
38  
39  
40  
41  
42  
43  
44  
45  
46  
47  
48  
49  
50  
51  
52  
53  
54  
55  
56  
57  
58  
59  
60

1  
2  
3  
4  
5 **Radiologically isolated syndrome - an uncommon finding at a university clinic in a**  
6  
7 **high-prevalence region for multiple sclerosis**  
8  
9

10  
11 Dr Tobias Granberg<sup>a</sup>, MD; Dr Juha Martola<sup>a</sup>, MD, PhD; Prof Peter Aspelin<sup>a</sup>, MD, PhD;

12  
13 Assoc prof Maria Kristoffersen-Wiberg<sup>a</sup>, MD, PhD; Prof Sten Fredrikson<sup>b</sup>, MD, PhD.

14  
15 <sup>a</sup>Department of Clinical Science, Intervention and Technology, Karolinska Institutet,  
16  
17 Stockholm, Sweden.

18  
19 <sup>b</sup>Department of Clinical Neuroscience, Karolinska Institutet, Stockholm, Sweden.  
20  
21

22  
23  
24  
25 Corresponding author:

26  
27 Tobias Granberg

28  
29 Department of Clinical Science, Intervention and Technology, C1-46

30  
31 Karolinska University Hospital

32  
33 141 86 STOCKHOLM, SWEDEN

34  
35 Email: [tobias.granberg@ki.se](mailto:tobias.granberg@ki.se)

36  
37 Telephone (mobile): +46 700 60 60 87

38  
39 Fax: +46 87 11 48 40  
40  
41

42  
43  
44  
45 Word count: 2925

46  
47 Number of tables: 3

48  
49 Number of figures: 2 (2 black-and-white, 0 in colour)

50  
51 Supplementary files: None

52  
53  
54 Keywords: Radiologically Isolated Syndrome, Multiple Sclerosis, Magnetic Resonance

55  
56 Imaging, Incidental findings, Asymptomatic diseases  
57  
58  
59  
60

**ABSTRACT**

**Objective:** The improved availability of magnetic resonance imaging (MRI) in medicine has led to an increase in incidental findings. Unexpected brain MRI findings suggestive of multiple sclerosis (MS) without typical symptoms of MS were recently defined as radiologically isolated syndrome (RIS). The prevalence of RIS is uncertain. The aim of this study was to determine the prevalence of RIS at a university hospital in a region with a high prevalence for MS and describe the long-term prognosis of the identified patients.

**Design:** Retrospective cohort study conducted in 2012.

**Setting:** All brain MRI examinations performed at Karolinska University Hospital in Huddinge, Stockholm, Sweden during 2001 were retrospectively screened by a single rater for findings fulfilling the Okuda criteria. The sample year was chosen in order to establish the long-term prognosis of the patients identified. The examinations of interest were re-evaluated according to the Barkhof criteria by a neuroradiologist with long experience in MS.

**Participants:** In total 2105 individuals were included in the study. Ages ranged from 0 to 90 years with a median age of 48 years. Only one patient with RIS was identified, equivalent to a prevalence of 0.05% in the studied population, or 0.15% among patients aged 15 to 40 years. The patient with RIS developed symptoms consistent with MS within three months accompanied with radiological progression and was diagnosed with MS.

**Conclusions:** RIS, according to present criteria, is an uncommon finding in a tertiary [hospital](#) setting in a high-prevalence region for MS where awareness and clinical suspicion of MS is common. In order to study the prognosis of RIS, multi-center studies, or case-control studies are recommended.

## ARTICLE SUMMARY

### Article focus

- Incidental magnetic resonance imaging findings suggestive of multiple sclerosis in patients without typical symptoms of demyelinating disease is called Radiologically Isolated Syndrome and poses a clinical dilemma for physicians.
- The aim of this study was to investigate the prevalence of the newly defined Radiologically Isolated Syndrome at a university clinic in Stockholm, Sweden.

### Key messages

- Radiologically Isolated Syndrome was an uncommon finding, and was identified only in 1 out of 2105 examined individuals (0.05 %).
- The patient rapidly progressed radiologically and clinically to multiple sclerosis.

### Strengths and limitations of this study

- This is the first study reporting on the frequency of Radiologically Isolated Syndrome in a high-prevalence region for multiple sclerosis.
- The study was a systematic re-evaluation of a yearly sample at a large university clinic.
- The retrospective nature of the study gives the possibility to report on the long-term prognosis for the patients, but also gives rise to losses to follow-up.
- The generalizability of the results to non-tertiary hospital settings and to regions with a

1  
2  
3 lower prevalence of multiple sclerosis is limited.  
4  
5  
6  
7  
8  
9  
10  
11  
12  
13  
14  
15  
16  
17  
18  
19  
20  
21  
22  
23  
24  
25  
26  
27  
28  
29  
30  
31  
32  
33  
34  
35  
36  
37  
38  
39  
40  
41  
42  
43  
44  
45  
46  
47  
48  
49  
50  
51  
52  
53  
54  
55  
56  
57  
58  
59  
60

For peer review only

## INTRODUCTION

Magnetic resonance imaging (MRI) has revolutionised our ability to image the central nervous system and it has become readily accessible in clinical practice. With the improved availability and sensitivity of MRI there is an increase in incidental findings.<sup>1</sup> In 2009, Okuda and colleagues defined incidental MRI findings suggestive of multiple sclerosis (MS) without typical MS symptoms as Radiologically Isolated Syndrome (RIS).<sup>2</sup> This has led to an increased awareness of this condition and a convergence in terminology.<sup>3</sup>

Since the definition of RIS, studies by ~~Lebrun, Okuda, de Stefano, Amato, Siva, Giorgio, and their colleagues have been especially important in showing several groups have shown~~ that there is a close association between RIS and MS. Patients with RIS often have a subclinical cognitive impairment with a similar test profile of deficits compared to patients with MS.<sup>4-6</sup> The association of RIS and MS is also strengthened in that both patient groups show similarities in both qualitative and quantitative MRI measurements.<sup>6-8</sup> There are case reports with follow-ups of up to 10 years,<sup>4,9,10</sup> and the range of mean follow-up times in the published cohorts are 2.4 to 7 years.<sup>2,11-17</sup> These studies show that roughly two-thirds progress radiologically and one-third develop clinical symptoms, and thereby convert to clinically isolated syndrome or MS, during their follow-up times.<sup>3</sup> This suggests that RIS in some cases may be considered to be preclinical MS. The patients with RIS is therefore of particular interest to study in a pathophysiological aspect since it may shed light on early changes that precedes the onset of classical MS symptoms.

Headache is the most common reason for performing the initial MRI unveiling RIS, but it is unclear if there is a causative relationship between the incidental MRI findings and the headaches.<sup>3</sup> Recently a study by Liu and colleagues showed that among patients undergoing a MRI of the brain due to headaches, MRI findings fulfilling the Barkhof criteria are common.

1  
2  
3 Depending on the definition of juxtacortical and periventricular, 2.4–7.1% of the patients  
4 fulfilled the Barkhof criteria.<sup>18</sup>  
5  
6  
7

8  
9 Incidental MS findings are previously known from autopsy studies from the late 20<sup>th</sup> century  
10 indicating a frequency of unexpected post-mortem MS findings in the range of 0.08–0.2%.<sup>19–</sup>  
11

12  
13  
14 <sup>22</sup> The incidence and prevalence of the newly defined RIS is, however, currently unknown.<sup>3</sup> In  
15  
16 2009 Morris and colleagues published a meta-analysis of 16 studies including 15,559 healthy  
17  
18 control subjects that reported nine cases of “definite demyelination” and four cases of  
19  
20 “possible demyelination” corresponding to a frequency of 0.06% and 0.03% respectively.<sup>1</sup>  
21

22  
23 There is unfortunately no report on the clinical history or neurological examination of these  
24  
25 cases why the results cannot be assumed to reflect RIS. Instead the results of five original  
26  
27 articles, identified as the most relevant, are described below.  
28  
29

30  
31  
32 An American study published in 1996, described 23 patients with MRI findings highly  
33  
34 suggestive of MS (according to Paty’s classification) in a population of 2,783 psychiatric  
35  
36 patients. However, 13 patients had neurological symptoms that were not further specified,  
37  
38 which gives a possible asymptomatic frequency of roughly 0.4%. It is unknown if these  
39  
40 patients had any neurological findings that would exclude them from a RIS diagnosis.<sup>23</sup> The  
41

42  
43 results are nonetheless interesting since psychiatric symptoms have frequently been reported  
44  
45 as the original indication for performing the MRI examination that unveiled the RIS.<sup>3</sup> A  
46  
47 second American study published in 1999 showed that among 1,000 asymptomatic subjects,  
48  
49 there were three persons (0.3%) with findings classified as possible demyelinating disease.<sup>24</sup>  
50

51  
52 A German study published in 2006 described a cohort of 2,536 young male military recruits  
53  
54 in which one person (0.04%) had findings suggestive of demyelinating disease, but it is not  
55  
56 specified if this person had any neurological symptoms or findings.<sup>25</sup> A second German study  
57  
58 was published in 2010, which showed that of 206 healthy young volunteers two (1.0%) had  
59  
60



1  
2  
3 multiple white matter lesions, but it is unclear whether the findings fulfilled the Barkhof  
4  
5 criteria.<sup>26</sup>  
6  
7

8  
9  
10 The ~~only-first~~ study reporting on the frequency of RIS since its definition ~~comes-was~~ a  
11 hospital-based study from Pakistan published in 2011. It revealed that out of 864 persons in  
12 the ages 15 to 40 years there were six cases (0.7%) of incidental MRI findings suggestive of  
13 MS in patients without relapsing neurological symptoms or pathological neurological  
14 findings.<sup>27</sup> This ~~last~~ study reported a surprisingly high frequency of such findings in a region  
15 with a low prevalence of MS (<5 per 100,000 population).<sup>28</sup> In comparison the estimated  
16 prevalence of MS in Sweden, where the present study was conducted, is 189 per 100,000  
17 population.<sup>29</sup> Recently a second study using the RIS criteria was published in 2013 that  
18 demonstrated the frequency of RIS findings in asymptomatic relatives to MS patients and  
19 healthy controls. It showed that 2 out of 68 (2.9%) healthy relatives of MS patients and that 2  
20 out of 82 (2.4%) of the healthy controls fulfilled the Okuda criteria.<sup>30</sup>  
21  
22  
23  
24  
25  
26  
27  
28  
29  
30  
31  
32  
33  
34  
35

36 In conclusion there has not been any study reporting on the hospital-based prevalence of RIS  
37 in a high-prevalence region for MS since the definition of RIS. This study aims to clarify in  
38 what frequency RIS findings can be expected in a tertiary hospital setting in a high-prevalence  
39 region for MS and depict the long-term prognosis of RIS in the patients identified.  
40  
41  
42  
43  
44  
45  
46

## 47 METHODS

### 48 Study population and ethical approval

49 The study sample in this retrospective study conducted in 2012 is based on the digital  
50 radiological information system and digital patient charts at Karolinska University Hospital,  
51 Huddinge (formerly Huddinge University Hospital), Stockholm, Sweden. The hospital is a  
52 tertiary referral hospital for the greater southern Stockholm area with a population of 800,000  
53  
54  
55  
56  
57  
58  
59  
60

1  
2  
3 inhabitants. Although the study was conducted in 2012, the sample year was chosen to be  
4 2001~~In order to establish the long term prognosis of the patients identified the sample year~~  
5 ~~was chosen to 2001~~, when both the patient charts and the radiological data were fully  
6 digitalised, in order to be able to show the natural long-term prognosis over the past 11 years  
7 for any RIS cases identified. All persons undergoing a brain MRI at the hospital during the  
8 sample year were included in the study. The study was approved by the regional ethical  
9 review board in Stockholm at Karolinska Institutet, which allowed a general screening of the  
10 examinations described above, and written informed consent was obtained according to the  
11 approval in those cases where more information was necessary through access of the clinical  
12 patient charts.  
13  
14  
15  
16  
17  
18  
19  
20  
21  
22  
23  
24  
25  
26

### 27 **Screening method**

28  
29 The screening of the study population was made systematically by one physician at the  
30 radiology department with previous experience of radiological research (TG). All  
31 documentation from the MRI examinations from 2001 was available to the screener and read  
32 to full extent. The material included both the query, the clinical information in the referral  
33 (clinical history, symptoms, and findings) as well as the radiological findings according to the  
34 regular clinical radiological assessment.  
35  
36  
37  
38  
39  
40  
41  
42  
43  
44

### 45 **MRI examinations**

46  
47 All MRI examinations were performed in the regular clinical setting in one of two 1.5 T MRI  
48 machines, Siemens Magnetom Vision and Symphony (Siemens Medical Systems GmbH,  
49 Erlangen, Germany). The MRI examinations were performed according to standard clinical  
50 protocols depending on the original clinical query and white matter anomalies were in most  
51 cases further characterised with the standardised MS MRI protocol used at the clinic  
52 described in Table 1.  
53  
54  
55  
56  
57  
58  
59  
60

**Table 1**

MRI parameters of the standardised MS protocol

| Sequence  | Plane    | SLT<br>(mm) | TR<br>(ms) | TE<br>(ms) | TI<br>(ms) | FA<br>(°) |
|-----------|----------|-------------|------------|------------|------------|-----------|
| T1 MPRAGE | Axial    | 1.5         | 13.5       | 7          | 300        | 15        |
| PD TSE    | Axial    | 3.0         | 4761       | 22         | -          | 180       |
| T2 TSE    | Axial    | 3.0         | 4761       | 90         | -          | 180       |
| T2 TSE*   | Sagittal | 4.0         | 3500       | 96         | -          | 180       |
| FLAIR*    | Axial    | 5.0         | 9000       | 110        | 2500       | 180       |
| T1 SE*    | Axial    | 5.0         | 570        | 14         | -          | 90        |

\*Acquired post-gadolinium-DTPA contrast media.

FA, flip angle; FLAIR, fluid attenuated inversion recovery; MPRAGE, three-dimensional magnetization prepared rapid acquisition gradient echo; PD, proton density; SE, spin echo; SLT, slice thickness; TE, echo time; TI, inversion time; TR, repetition time; TSE, turbo spin echo.

**Radiological assessment**

All examinations had been reviewed, signed, and contra-signed as part of the regular clinical radiological routine. At least one of the clinical reviewers was a specialist in neuroradiology.

The examinations identified with possible RIS findings in the screening process were re-evaluated according to the Barkhof criteria by another neuroradiologist (JM) with long experience of classifying MS-like findings.

**Clinical assessment**

The referring doctor conducted the initial clinical assessments. All patients that were identified as possible RIS cases in the screening had been examined by a neurologists as part of the following clinical investigation. All patients diagnosed with MS received their diagnosis according to contemporaneous diagnostic criteria after careful investigation lead by a neurologist with experience of MS.

**RESULTS****Prevalence of RIS**

During the year of 2001 a total of 2105 individuals had at least one MRI examination of the brain at Karolinska University Hospital in Huddinge, Stockholm, Sweden. Among the patients there were 903 men (43%) and 1202 women (57%) with an age span of 0 to 90 years with 669 persons being between 15 and 40 years of age. Mean age was 46.2 years and median age was 48 years. The following results are also schematically described in Figure 1. Out of all patients 542 had normal findings. The spectrum of findings is presented in Table 2. Common findings besides white matter changes were tumours, atrophy, infarctions, and sinusitis.

**Table 2**

Overview of MRI findings (n)

|                                                     |             |
|-----------------------------------------------------|-------------|
| <b>Within normal limits</b>                         | <b>542</b>  |
| <b>Cerebrovascular disorders</b>                    | <b>326</b>  |
| - Aneurysm                                          | 8           |
| - Carotid dissection or occlusion                   | 12          |
| - Cavernous malformation                            | 19          |
| - Cerebral contusions                               | 4           |
| - Cortical infarction                               | 89          |
| - Developmental venous anomaly                      | 29          |
| - Lacunar infarction                                | 133         |
| - Intracerebral haemorrhage                         | 15          |
| - Cerebral venous sinus thrombosis                  | 5           |
| - Subarachnoid haemorrhage                          | 3           |
| - Subdural hematoma or hygroma                      | 6           |
| - Other                                             | 3           |
| <b>White matter and neurodegenerative disorders</b> | <b>1143</b> |
| - Atrophy                                           | 285         |
| - Basal ganglia disorders                           | 12          |
| - Hydrocephalus                                     | 20          |
| - Marked perivascular spaces                        | 37          |
| - Possibly inflammatory white matter changes        | 356         |
| - Unspecific or degenerative white matter changes   | 433         |

|                                                         |            |
|---------------------------------------------------------|------------|
| <b>Infectious, inflammatory and metabolic disorders</b> | <b>88</b>  |
| - Cerebral abscess                                      | 7          |
| - Congenital metabolic disorders                        | 4          |
| - Encephalitis                                          | 10         |
| - Meningitis                                            | 15         |
| - Optical neuritis                                      | 37         |
| - Vasculitis                                            | 4          |
| - Other                                                 | 11         |
| <b>Neoplasms</b>                                        | <b>311</b> |
| - Acoustic neuroma                                      | 19         |
| - Glioma                                                | 21         |
| - Meningioma                                            | 44         |
| - Metastasis                                            | 18         |
| - Pituitary adenoma                                     | 31         |
| - Unspecified or other type of neoplasm                 | 46         |
| <b>Cysts and malformations</b>                          | <b>74</b>  |
| - Arachnoid cyst                                        | 24         |
| - Empty sella                                           | 9          |
| - Malformation or dysplasia                             | 16         |
| - Parenchymal cyst                                      | 5          |
| - Pineal cyst                                           | 13         |
| - Pituitary cyst                                        | 7          |
| <b>Sinonasal and orbital disorders</b>                  | <b>191</b> |
| - Sinusitis                                             | 164        |
| - Mastoiditis                                           | 23         |
| - Other                                                 | 4          |

In total 789 patients had white matter anomalies (not involving those caused by other diseases). Out of these patients, 433 had unspecific white matter changes that did not fulfil the Barkhof criteria (solitary findings) or had a more likely explanation; such as an ischemic-degenerative pattern in elderly and/or patients with known severe cardiovascular disease. Out of the 356 patients with white matter changes possibly reflecting demyelinating disease, 158 patients were known to have MS and 6 received their MS diagnosis as part of the investigation in question. Out of the 192 remaining patients 139 were reported to have

1  
2  
3 apparent neurological symptoms in the referral that would exclude the findings from being  
4  
5 classified as RIS according to the B criteria in the Okuda classification, but where it was  
6  
7 unclear if they had already gotten a diagnosis of Clinically Isolated Syndrome or MS. After  
8  
9 this screening only 53 patients remained with findings that were plausible RIS but where  
10  
11 more clinical information was needed. In compliance with the ethical approval these patients  
12  
13 were asked for written informed consent in order for us to evaluate their clinical patient  
14  
15 charts.  
16  
17

18  
19  
20 Of these 53 patients where further information was needed, 3 patients were deceased, 7 did  
21  
22 not respond and 4 declined participation. The patient charts of the remaining 39 persons that  
23  
24 gave their informed consent were then examined in order to better understand the patients'  
25  
26 clinical history, symptoms and neurological findings. This additional information revealed  
27  
28 that 21 had been diagnosed with MS. Another 12 had intermittent clinical symptoms  
29  
30 dismissing a RIS classification, presented in Table 3, but where the patients had not yet  
31  
32 received a diagnosis of MS. In 3 cases there was insufficient clinical data to draw a  
33  
34 conclusion. In the end, 3 patients with plausible RIS remained and after neuroradiological  
35  
36 assessment 1 patient was classified as having RIS. This is equivalent to a prevalence of 0.05%  
37  
38 in the studied population and 0.15% among the patients in the ages of 15 to 40 years.  
39  
40  
41  
42  
43  
44

45 **Table 3**

46  
47 Presenting symptoms in the 12 patients not classified as RIS

| Sex | Age (years) | Symptoms                                 |
|-----|-------------|------------------------------------------|
| F   | 25          | Optical neuritis, Lhermitte's sign       |
| F   | 26          | Diplopia, hemiparesis                    |
| F   | 39          | Optical neuritis, facial hemidysesthesia |
| F   | 43          | Optical neuritis                         |
| F   | 47          | Recurrent hemidysesthesia                |
| F   | 58          | Trigeminal neuralgia                     |
| F   | 62          | Hemidysesthesia, facial paralysis        |
| F   | 62          | Hemidysesthesia                          |

|   |    |                                |
|---|----|--------------------------------|
| M | 18 | Severe vertigo, ataxia         |
| M | 18 | Lhermitte's sign               |
| M | 27 | Diplopia, vertigo, dysesthesia |
| M | 44 | Hypesthesia                    |

F, female; M, male.

### Case description

The patient with RIS was a 43 year-old woman without any neurological symptoms or any history of neurological disorders except for migraine since more than 10 years. A neurological examination did not reveal any pathological findings. She had good effect of triptanes. Due to her long history of migraine and still frequent attacks she was referred for a MRI of the brain in February of 2001. The scan showed 15 supratentorial T2 lesions, out of which 12 were periventricular and 2 were juxtacortical. Gadolinium enhanced sequences showed enhancement in one of the lesions. Thus three out of four of the Barkhof criteria were fulfilled.<sup>31</sup> Images obtained from this subject can be seen in Figure 2. Because of the MRI findings, she was referred to a neurologist in March where a second neurological examination was normal. CSF analysis revealed oligoclonal bands and an elevated IgG index. In May she returned to the neurological clinic due to a sudden onset of intermittent bilateral symptoms in arms and hands. A new neurological examination revealed bilateral tremor and dysmetria. A new MRI in June showed three new non-enhancing supratentorial lesions. She was diagnosed with MS and at a follow-up in September the symptoms in the upper extremities had worsened. She received prednisolone treatment and was started on interferon beta therapy. In November she had Lhermitte's sign and a MRI showed a cervical spine lesion. Except for one occurrence of lower extremity symptoms in 2005, she has remained relapse free as of the latest neurological follow-up in March 2013.

### DISCUSSION

1  
2  
3 This study shows that RIS, according to present stringent criteria, is an uncommon finding, in  
4  
5 a tertiary radiological clinic in a region with a high prevalence of MS, where awareness and  
6  
7 clinical suspicion of MS is common.<sup>29</sup> The RIS frequency of 0.05% is in alignment with  
8  
9 previous anatomic-pathological studies and earlier MRI studies have shown that “incidental”  
10  
11 or “asymptomatic” MS is relatively uncommon.<sup>19–26</sup> The only hospital-based reported  
12  
13 frequency of RIS since its definition, 0.7%, comes from a report from the Karachi region of  
14  
15 Pakistan.<sup>27</sup> In contrast, the current study reports a frequency of RIS of 0.15% in the same age  
16  
17 group. Although the studies are not directly comparable due to dissimilarities in methodology,  
18  
19 it is of interest to consider the difference in results further. A possible explanation may be the  
20  
21 high awareness of MS in Sweden and frequent clinical suspicion when referring patients for  
22  
23 MRI. The results could possibly also be affected by the fact that a majority of the referrals to  
24  
25 the radiological clinic participating in this study comes from the in-hospital clinics, whilst  
26  
27 patients initially seeking their family practitioner might have been referred to a non-tertiary  
28  
29 radiological clinic for an MRI. How the fact that the study site is a tertiary setting has affected  
30  
31 the reported prevalence is therefore hard to appreciate. Another explanation for the difference  
32  
33 might be that the study from Pakistan was a semi-retrospective and -prospective study, which  
34  
35 might have been more effective in identifying patients with these findings and suffering from  
36  
37 less losses to follow-up. In the study from Pakistan there were also fewer patients examined in  
38  
39 a more densely populated area, likely mirroring a lower availability of MRI in the Karachi  
40  
41 region than the Stockholm region, perhaps making the patients who were examined with a  
42  
43 MRI of the brain in Karachi more likely to have findings. The published RIS cohorts are  
44  
45 samples from Brazil, France, Italy, Spain, Turkey, and USA,<sup>2,7,11–17</sup> regions that vary from  
46  
47 low to high prevalence.<sup>32</sup> It would be of interest to further evaluate the RIS prevalence in  
48  
49 relation to the global MS prevalence.  
50  
51  
52  
53  
54  
55  
56  
57  
58  
59  
60



1  
2  
3 Interestingly, the study published by Gabelic and colleagues shows that 2.9% of the healthy  
4 relatives of MS patients and 2.4% of the healthy controls in their study fulfilled Okuda's RIS  
5 criteria.<sup>30</sup> This might indicate that the frequency of RIS findings would paradoxically be  
6 higher in the general population than found in the current study. However, differences in  
7 methodologies and demography of the research subjects limit the comparability of the current  
8 study to Gabelic's work. The studies were not performed in the same region and with  
9 different aims. While this study aimed to describe the hospital-based frequency of RIS  
10 without limitations in terms of age groups, Gabelic's study was performed in a different  
11 country and studied the frequency of RIS in healthy hospital personnel and volunteers  
12 recruited through newspaper advertisement within a homogenous age group with a mean age  
13 of 40 years.  
14  
15  
16  
17  
18  
19  
20  
21  
22  
23  
24  
25  
26  
27  
28

29  
30 A limitation of this study is the retrospective design with a single rater that may have led to  
31 patients being missed in the screening although a systematic approach was taken. By relying  
32 on the clinical evaluations in the screening process it is possible that patients with findings  
33 fulfilling the Barkhof criteria were missed. We believe that such gross errors are unlikely  
34 since at least one neuroradiologist and in total usually two radiologists evaluated all  
35 examinations as part of the clinical diagnostics. This being said, any patient missed would  
36 affect the reported frequency significantly due to the low prevalence of RIS. In terms of losses  
37 to follow-up, assuming that the frequency of RIS was the same in the 17 plausible RIS  
38 patients lost to follow-up as in those with all data available (1 case of RIS in 36 patients with  
39 plausible RIS), this would be equivalent to  $1/36 \times 17 = 0.47$ . This would increase the RIS  
40 frequency to 0.07%, or double the reported frequency to 0.1%, if rounded up to one patient. It  
41 is also unexpected that no elderly patients were classified as RIS since the presence of  
42 asymptomatic white matter lesions increase with age.<sup>33</sup> This might be due to the clinical  
43 information being available in the screening process, making it more likely to classify these  
44  
45  
46  
47  
48  
49  
50  
51  
52  
53  
54  
55  
56  
57  
58  
59  
60

1  
2  
3 white matter changes as ischemic-degenerative. The study period was chosen to be the year  
4  
5 2001 in order to be able to show the natural long-term prognosis for the RIS cases identified  
6  
7 with a potential follow-up period of 11 years. The reasoning for this was that regarding the  
8  
9 published RIS cohorts, especially the retrospective cohorts, it is often unclear how the patients  
10  
11 were initially identified. The hypothesis was therefore that patients with RIS that do not  
12  
13 progress clinically are less likely to be noticed in the clinical setting, decreasing the chance of  
14  
15 being included in a cohort, giving the observed cohort a worse prognosis. The study design  
16  
17 did unfortunately not prove very helpful since only one case was identified, which limits the  
18  
19 possibility of studying the prognosis. Although the study was conducted in 2001, it was  
20  
21 conducted on modern 1.5 T MRI machines why the low frequency of RIS findings is hardly  
22  
23 explained by technical reasons.  
24  
25  
26  
27  
28

29  
30 In conclusion this study suggest that RIS, according to present stringent criteria, is an  
31  
32 uncommon finding in a tertiary hospital setting in a region with a high prevalence of MS. In  
33  
34 order to more accurately determine the frequency of RIS in relation to MS prevalence, non-  
35  
36 selected populations in large prospective studies actively involving both radiologists and  
37  
38 neurologists are needed. In order to be able to study the prognosis of these patients large  
39  
40 multi-center studies or case-control studies are recommended.  
41  
42  
43  
44

#### 45 **ACKNOWLEDGEMENTS**

46  
47 We thank Helena Forssell and Karin Kjellsdotter for their administrative support. We would  
48  
49 also like to acknowledge Sara Shams for valuable comments on the manuscript for this  
50  
51 article.  
52  
53  
54

#### 55 **FOOT NOTES**

##### 56 **Contributors**

1  
2  
3 TG initiated the study, designed data collection tools, performed the screening of all MRI  
4  
5 examinations, monitored data collection, and drafted the paper. He is guarantor. JM  
6  
7 performed neuroradiological image analysis. TG, JM, MKW, PA and SF all conceived and  
8  
9 designed the study, analysed the data, and revised the paper.  
10

### 11 12 13 14 **Funding**

15  
16 This research was funded by from Stockholm County Council and Karolinska Institutet  
17  
18 through the regional agreement on medical training and clinical research (ALF grant  
19  
20 20120213).  
21  
22  
23

### 24 25 **Competing interests**

26  
27 SF has received honoraria for lectures or educational activities from Allergan, Bayer, Biogen  
28  
29 Idec, Merck Serono, Novartis, Sanofi and Teva. All other authors declare no competing  
30  
31 interests.  
32  
33  
34

### 35 36 **Ethics approval**

37  
38 This study was conducted with the approval of the regional ethical review board in Stockholm  
39  
40 at Karolinska Institutet.  
41  
42  
43

### 44 45 **Patient consent**

46  
47 Obtained.  
48  
49  
50

### 51 52 **Data sharing statement**

53  
54 No additional data are available.  
55  
56  
57

## 58 **REFERENCES**

- 1 Morris Z, Whiteley WN, Longstreth WT Jr, *et al.* Incidental findings on brain magnetic resonance imaging: systematic review and meta-analysis. *BMJ* 2009;**339**:b3016  
doi:10.1136/bmj.b3016
- 2 Okuda DT, Mowry EM, Beheshtian A, *et al.* Incidental MRI anomalies suggestive of multiple sclerosis: the radiologically isolated syndrome [correction appears in *Neurology*. 2009;**72**:1284]. *Neurology* 2009;**72**:800–5. doi:10.1212/01.wnl.0000335764.14513.1a
- 3 Granberg T, Martola J, Kristoffersen-Wiberg M, *et al.* Radiologically isolated syndrome – incidental magnetic resonance imaging findings suggestive of multiple sclerosis, a systematic review. *Mult Scler* 2013;**19**:271–80. doi:10.1177/1352458512451943
- 4 Hakiki B, Goretti B, Portaccio E, *et al.* ‘Subclinical MS’: follow-up of four cases. *Eur J Neurol* 2008;**15**:858–61. doi:10.1111/j.1468-1331.2008.02155.x
- 5 Lebrun C, Blanc F, Brassat D, *et al.* Cognitive function in radiologically isolated syndrome. *Mult Scler* 2010;**16**:919–25. doi:10.1177/1352458510375707
- 6 Amato MP, Hakiki B, Goretti B, *et al.* Association of MRI metrics and cognitive impairment in radiologically isolated syndromes. *Neurology* 2012;**78**:309–14.  
doi:10.1212/WNL.0b013e31824528c9
- 7 De Stefano N, Stromillo ML, Rossi F, *et al.* Improving the characterization of radiologically isolated syndrome suggestive of multiple sclerosis. *PLoS ONE* 2011;**6**:e19452. doi:10.1371/journal.pone.0019452
- 8 Stromillo ML, Giorgio A, Rossi F, *et al.* Brain metabolic changes suggestive of axonal damage in radiologically isolated syndrome. *Neurology* 2013;**80**:2090–4. doi:  
10.1212/WNL.0b013e318295d707
- 9 McDonnell GV, Cabrera-Gomez J, Calne DB, *et al.* Clinical presentation of primary progressive multiple sclerosis 10 years after the incidental finding of typical magnetic resonance imaging brain lesions: the subclinical stage of primary progressive multiple sclerosis may last 10 years. *Mult Scler* 2003;**9**:204–9. doi:10.1191/1352458503ms890cr

- 1  
2  
3 10 Spain R, Bourdette D. The radiologically isolated syndrome: look (again) before you  
4 treat. *Curr Neurol Neurosci Rep* 2011;**11**:498–506. doi:10.1007/s11910-011-0213-z  
5  
6  
7 11 Lebrun C, Bensa C, Debouverie M, *et al.* Unexpected multiple sclerosis: follow-up of 30  
8 patients with magnetic resonance imaging and clinical conversion profile. *J Neurol*  
9 *Neurosurg Ps* 2008;**79**:195–8. doi:10.1136/jnnp.2006.108274  
10  
11  
12  
13  
14 12 Lebrun C, Bensa C, Debouverie M, *et al.* Association Between Clinical Conversion to  
15 Multiple Sclerosis in Radiologically Isolated Syndrome and Magnetic Resonance  
16 Imaging, Cerebrospinal Fluid, and Visual Evoked Potential: Follow-up of 70 Patients.  
17 *Arch Neurol* 2009;**66**:841–6. doi:10.1001/archneurol.2009.119  
18  
19  
20  
21  
22  
23 13 Siva A, Saip S, Altintas A, *et al.* Multiple sclerosis risk in radiologically uncovered  
24 asymptomatic possible inflammatory-demyelinating disease. *Mult Scler* 2009;**15**:918–27.  
25 doi:10.1177/1352458509106214  
26  
27  
28  
29  
30 14 Sierra-Marcos A, Mitjana R, Castelló J, *et al.* [Demyelinating lesions as incidental  
31 findings in magnetic resonance imaging: a study of 11 cases with clinico-radiological  
32 follow-up and a review of the literature]. (In Spanish) *Rev Neurol* 2010;**51**:129–34.  
33  
34  
35  
36 15 Okuda DT, Mowry EM, Cree BAC, *et al.* Asymptomatic spinal cord lesions predict  
37 disease progression in radiologically isolated syndrome. *Neurology* 2011;**76**:686–92.  
38 doi:10.1212/WNL.0b013e31820d8b1d  
39  
40  
41  
42  
43 16 Maia ACM Jr, da Rocha AJ, Barros BR, *et al.* Incidental demyelinating inflammatory  
44 lesions in asymptomatic patients: a Brazilian cohort with radiologically isolated  
45 syndrome and a critical review of current literature. *Arq Neuropsiquiatr* 2012;**70**:5–11.  
46 doi:10.1590/S0004-282X2012000100003  
47  
48  
49  
50  
51  
52 17 Lebrun C, Page EL, Kantarci O, *et al.* Impact of pregnancy on conversion to clinically  
53 isolated syndrome in a radiologically isolated syndrome cohort. *Mult Scler*  
54 2012;**18**:1297–302. doi:10.1177/1352458511435931  
55  
56  
57  
58  
59 18 Liu S, Kullnat J, Bourdette D, *et al.* Prevalence of brain magnetic resonance imaging  
60

meeting Barkhof and McDonald criteria for dissemination in space among headache patients. *Mult Scler* Published Online First: 4 February 2013.

doi:10.1177/1352458512471874

- 19 Georgi W. [Multiple sclerosis. Anatomopathological findings of multiple sclerosis in diseases not clinically diagnosed]. (In German). *Schweiz Med Wochenschr* 1961;**91**:605–7.
- 20 Gilbert JJ, Sadler M. Unsuspected multiple sclerosis. *Arch Neurol* 1983;**40**:533–6.  
doi:10.1001/archneur.1983.04050080033003
- 21 Engell T. A clinical patho-anatomical study of clinically silent multiple sclerosis. *Acta Neurol Scand* 1989;**79**:428–30. doi:10.1111/j.1600-0404.1989.tb03811.x
- 22 Johannsen LG, Stenager E, Jensen K. Clinically unexpected multiple sclerosis in patients with mental disorders. A series of 7301 psychiatric autopsies. *Acta Neurol Belg* 1996;**96**:62–5.
- 23 Lyoo IK, Seol HY, Byun HS, *et al*. Unsuspected multiple sclerosis in patients with psychiatric disorders: a magnetic resonance imaging study. *J Neuropsychiatry Clin Neurosci* 1996;**8**:54–9.
- 24 Katzman GL DA. Incidental findings on brain magnetic resonance imaging from 1000 asymptomatic volunteers. *JAMA* 1999;**282**:36–9. doi:10.1001/jama.282.1.36
- 25 Weber F, Knopf H. Incidental findings in magnetic resonance imaging of the brains of healthy young men. *J Neurol Sci* 2006;**240**:81–4. doi:10.1016/j.jns.2005.09.008
- 26 Hartwigsen G, Siebner HR, Deuschl G, *et al*. Incidental Findings Are Frequent in Young Healthy Individuals Undergoing Magnetic Resonance Imaging in Brain Research Imaging Studies. *J Comput Assist Tomo* 2010;**34**:596–600.  
doi:10.1097/RCT.0b013e3181d9c2bb
- 27 Wasay M, Rizvi F, Azeemuddin M, *et al*. Incidental MRI lesions suggestive of multiple sclerosis in asymptomatic patients in Karachi, Pakistan. *J Neurol Neurosurg Psychiatry*

- 1  
2  
3 2011;**82**:83–5. doi:10.1136/jnnp.2009.180000  
4  
5 28 Wasay M, Khatri IA, Khealani B, *et al.* MS in Asian countries. *Int MS J* 2006;**13**:59–65.  
6  
7 29 Ahlgren C, Odén A, Lycke J. High nationwide prevalence of multiple sclerosis in  
8  
9 Sweden. *Mult Scler* 2011;**17**:901–8. doi:10.1177/1352458511403794  
10  
11 30 Gabelic T, Ramasamy DP, Weinstock-Guttman B, *et al.* Prevalence of Radiologically  
12 Isolated Syndrome and White Matter Signal Abnormalities in Healthy Relatives of  
13 Multiple Sclerosis Patients. *Am J Neuroradiol* Published Online First: 25 July 2013.  
14 doi:10.3174/ajnr.A3653  
15  
16  
17  
18  
19  
20  
21 31 Barkhof F, Filippi M, Miller DH, *et al.* Comparison of MRI criteria at first presentation  
22 to predict conversion to clinically definite multiple sclerosis. *Brain* 1997;**120**:2059–69.  
23 doi:10.1093/brain/120.11.2059  
24  
25  
26  
27 32 Dua T. Atlas: multiple sclerosis resources in the world. Geneva, Switzerland: World  
28 Health Organization; Multiple Sclerosis International Federation 2008.  
29  
30  
31 33 Vernooij MW, Ikram MA, Tanghe HL, *et al.* Incidental findings on brain MRI in the  
32 general population. *N Engl J Med* 2007;**357**:1821–8. doi:10.1056/NEJMoa070972  
33  
34  
35  
36  
37  
38  
39  
40  
41  
42  
43  
44  
45  
46  
47  
48  
49  
50  
51  
52  
53  
54  
55  
56  
57  
58  
59  
60

1  
2  
3 **Figure 1**

4  
5 Flow chart of the screening process to identify patients with possible RIS  
6  
7  
8

9  
10 **Figure 2**

11 Axial FLAIR images of the identified RIS patient illustrating the multiple T2 hyperintensities  
12 and the contrast-enhancing lesion in the far right image  
13  
14  
15  
16  
17  
18  
19  
20  
21  
22  
23  
24  
25  
26  
27  
28  
29  
30  
31  
32  
33  
34  
35  
36  
37  
38  
39  
40  
41  
42  
43  
44  
45  
46  
47  
48  
49  
50  
51  
52  
53  
54  
55  
56  
57  
58  
59  
60



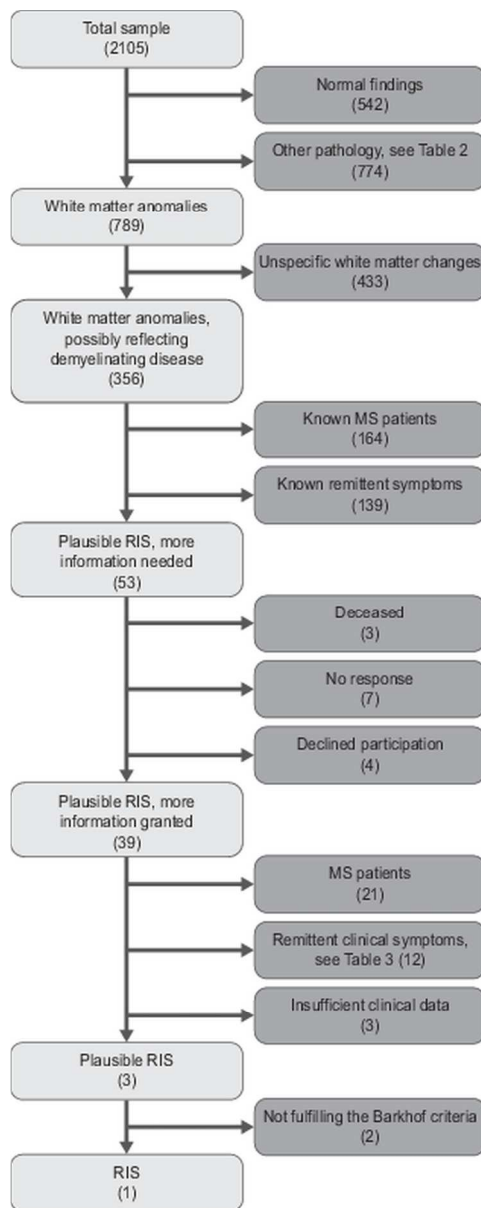

Flow chart of the screening process to identify patients with possible RIS  
90x227mm (300 x 300 DPI)



Axial FLAIR images of the identified RIS patient illustrating the multiple T2 hyperintensities and the contrast-enhancing lesion in the far right image  
173x67mm (300 x 300 DPI)

Peer review only

STROBE Statement—Checklist of items that should be included in reports of *cohort studies*

|                              | Item No | Recommendation                                                                                                                                                                                                                                                                                                                                                                                                |
|------------------------------|---------|---------------------------------------------------------------------------------------------------------------------------------------------------------------------------------------------------------------------------------------------------------------------------------------------------------------------------------------------------------------------------------------------------------------|
| <b>Title and abstract</b>    | 1       | (a) Indicate the study's design with a commonly used term in the title or the abstract<br>(b) Provide in the abstract an informative and balanced summary of what was done and what was found                                                                                                                                                                                                                 |
| <b>Introduction</b>          |         |                                                                                                                                                                                                                                                                                                                                                                                                               |
| Background/rationale         | 2       | Explain the scientific background and rationale for the investigation being reported                                                                                                                                                                                                                                                                                                                          |
| Objectives                   | 3       | State specific objectives, including any prespecified hypotheses                                                                                                                                                                                                                                                                                                                                              |
| <b>Methods</b>               |         |                                                                                                                                                                                                                                                                                                                                                                                                               |
| Study design                 | 4       | Present key elements of study design early in the paper                                                                                                                                                                                                                                                                                                                                                       |
| Setting                      | 5       | Describe the setting, locations, and relevant dates, including periods of recruitment, exposure, follow-up, and data collection                                                                                                                                                                                                                                                                               |
| Participants                 | 6       | (a) Give the eligibility criteria, and the sources and methods of selection of participants. Describe methods of follow-up<br>(b) For matched studies, give matching criteria and number of exposed and unexposed                                                                                                                                                                                             |
| Variables                    | 7       | Clearly define all outcomes, exposures, predictors, potential confounders, and effect modifiers. Give diagnostic criteria, if applicable                                                                                                                                                                                                                                                                      |
| Data sources/<br>measurement | 8*      | For each variable of interest, give sources of data and details of methods of assessment (measurement). Describe comparability of assessment methods if there is more than one group                                                                                                                                                                                                                          |
| Bias                         | 9       | Describe any efforts to address potential sources of bias                                                                                                                                                                                                                                                                                                                                                     |
| Study size                   | 10      | Explain how the study size was arrived at                                                                                                                                                                                                                                                                                                                                                                     |
| Quantitative variables       | 11      | Explain how quantitative variables were handled in the analyses. If applicable, describe which groupings were chosen and why                                                                                                                                                                                                                                                                                  |
| Statistical methods          | 12      | (a) Describe all statistical methods, including those used to control for confounding<br>(b) Describe any methods used to examine subgroups and interactions<br>(c) Explain how missing data were addressed<br>(d) If applicable, explain how loss to follow-up was addressed<br>(e) Describe any sensitivity analyses                                                                                        |
| <b>Results</b>               |         |                                                                                                                                                                                                                                                                                                                                                                                                               |
| Participants                 | 13*     | (a) Report numbers of individuals at each stage of study—eg numbers potentially eligible, examined for eligibility, confirmed eligible, included in the study, completing follow-up, and analysed<br>(b) Give reasons for non-participation at each stage<br>(c) Consider use of a flow diagram                                                                                                               |
| Descriptive data             | 14*     | (a) Give characteristics of study participants (eg demographic, clinical, social) and information on exposures and potential confounders<br>(b) Indicate number of participants with missing data for each variable of interest<br>(c) Summarise follow-up time (eg, average and total amount)                                                                                                                |
| Outcome data                 | 15*     | Report numbers of outcome events or summary measures over time                                                                                                                                                                                                                                                                                                                                                |
| Main results                 | 16      | (a) Give unadjusted estimates and, if applicable, confounder-adjusted estimates and their precision (eg, 95% confidence interval). Make clear which confounders were adjusted for and why they were included<br>(b) Report category boundaries when continuous variables were categorized<br>(c) If relevant, consider translating estimates of relative risk into absolute risk for a meaningful time period |

|                          |    |                                                                                                                                                                            |
|--------------------------|----|----------------------------------------------------------------------------------------------------------------------------------------------------------------------------|
| Other analyses           | 17 | Report other analyses done—eg analyses of subgroups and interactions, and sensitivity analyses                                                                             |
| <b>Discussion</b>        |    |                                                                                                                                                                            |
| Key results              | 18 | Summarise key results with reference to study objectives                                                                                                                   |
| Limitations              | 19 | Discuss limitations of the study, taking into account sources of potential bias or imprecision. Discuss both direction and magnitude of any potential bias                 |
| Interpretation           | 20 | Give a cautious overall interpretation of results considering objectives, limitations, multiplicity of analyses, results from similar studies, and other relevant evidence |
| Generalisability         | 21 | Discuss the generalisability (external validity) of the study results                                                                                                      |
| <b>Other information</b> |    |                                                                                                                                                                            |
| Funding                  | 22 | Give the source of funding and the role of the funders for the present study and, if applicable, for the original study on which the present article is based              |

\*Give information separately for exposed and unexposed groups.

**Note:** An Explanation and Elaboration article discusses each checklist item and gives methodological background and published examples of transparent reporting. The STROBE checklist is best used in conjunction with this article (freely available on the Web sites of PLoS Medicine at <http://www.plosmedicine.org/>, Annals of Internal Medicine at <http://www.annals.org/>, and Epidemiology at <http://www.epidem.com/>). Information on the STROBE Initiative is available at <http://www.strobe-statement.org>.
